# Supplementary material for: Exploring COVID-19 vaccine hesitancy and uptake in Nairobi’s urban informal settlements: an unsupervised machine learning analysis of a longitudinal prospective cohort study from 2021 to 2022
Source: HighWire-hosted journal article supplement (doi:10.1136/bmjopen-2022-071032), 2023-09-01
Supplement: bmjopen-2022-071032supp001_data_supplement.pdf [file bmjopen-2022-071032supp001_data_supplement.pdf]

| NO. FROM R1                                                                                                                                                                                                                                                                                                                                                                                                                                                                                                                                                                                                                                                                                                                                                                                                                                                                                                                                                                                                                                                                                                                                                                                                                                                                                                                                                                                                                                                                                                                                                                                                                                                                                                                                                                                                                                                                                                                                                                                                                                                                                                                                                                                                                                                                                                                                                                                                                                                                                                                                                                                                                                                                                                                                                                                                                                                                                                                                                                                                                                                                                                                                                                                                                                                             |   | NAME KLF R1 SEQU ENCE                                                                                                                                                                                                                                                                                                                                                                                                                                                                                                                                                                                                                                                                                                                                              | COVID-19 ADULT SURVEY - NAIROBI/NAIRKILIFIKISUMU - ROUND 2                                                                                                                                                                                                                                                                                                                                                                                                                                                                                                                                                                                                                                                                                                                                                                                                                                                                                                                                                                                                                                                                                                                                                                                                                                                                                                                                                                                                                                                                                                                                                                                                               |                    | SKIP TO |  |  |  |  |  |  |  |  |  |  |  |  |  |  |  |  |  |  |  |
|-------------------------------------------------------------------------------------------------------------------------------------------------------------------------------------------------------------------------------------------------------------------------------------------------------------------------------------------------------------------------------------------------------------------------------------------------------------------------------------------------------------------------------------------------------------------------------------------------------------------------------------------------------------------------------------------------------------------------------------------------------------------------------------------------------------------------------------------------------------------------------------------------------------------------------------------------------------------------------------------------------------------------------------------------------------------------------------------------------------------------------------------------------------------------------------------------------------------------------------------------------------------------------------------------------------------------------------------------------------------------------------------------------------------------------------------------------------------------------------------------------------------------------------------------------------------------------------------------------------------------------------------------------------------------------------------------------------------------------------------------------------------------------------------------------------------------------------------------------------------------------------------------------------------------------------------------------------------------------------------------------------------------------------------------------------------------------------------------------------------------------------------------------------------------------------------------------------------------------------------------------------------------------------------------------------------------------------------------------------------------------------------------------------------------------------------------------------------------------------------------------------------------------------------------------------------------------------------------------------------------------------------------------------------------------------------------------------------------------------------------------------------------------------------------------------------------------------------------------------------------------------------------------------------------------------------------------------------------------------------------------------------------------------------------------------------------------------------------------------------------------------------------------------------------------------------------------------------------------------------------------------------------|---|--------------------------------------------------------------------------------------------------------------------------------------------------------------------------------------------------------------------------------------------------------------------------------------------------------------------------------------------------------------------------------------------------------------------------------------------------------------------------------------------------------------------------------------------------------------------------------------------------------------------------------------------------------------------------------------------------------------------------------------------------------------------|--------------------------------------------------------------------------------------------------------------------------------------------------------------------------------------------------------------------------------------------------------------------------------------------------------------------------------------------------------------------------------------------------------------------------------------------------------------------------------------------------------------------------------------------------------------------------------------------------------------------------------------------------------------------------------------------------------------------------------------------------------------------------------------------------------------------------------------------------------------------------------------------------------------------------------------------------------------------------------------------------------------------------------------------------------------------------------------------------------------------------------------------------------------------------------------------------------------------------------------------------------------------------------------------------------------------------------------------------------------------------------------------------------------------------------------------------------------------------------------------------------------------------------------------------------------------------------------------------------------------------------------------------------------------------|--------------------|---------|--|--|--|--|--|--|--|--|--|--|--|--|--|--|--|--|--|--|--|
| QUESTIONS AND FILTERS                                                                                                                                                                                                                                                                                                                                                                                                                                                                                                                                                                                                                                                                                                                                                                                                                                                                                                                                                                                                                                                                                                                                                                                                                                                                                                                                                                                                                                                                                                                                                                                                                                                                                                                                                                                                                                                                                                                                                                                                                                                                                                                                                                                                                                                                                                                                                                                                                                                                                                                                                                                                                                                                                                                                                                                                                                                                                                                                                                                                                                                                                                                                                                                                                                                   |   |                                                                                                                                                                                                                                                                                                                                                                                                                                                                                                                                                                                                                                                                                                                                                                    |                                                                                                                                                                                                                                                                                                                                                                                                                                                                                                                                                                                                                                                                                                                                                                                                                                                                                                                                                                                                                                                                                                                                                                                                                                                                                                                                                                                                                                                                                                                                                                                                                                                                          |                    |         |  |  |  |  |  |  |  |  |  |  |  |  |  |  |  |  |  |  |  |
| <p>Hello, my name is [NAME] and I am calling from Population Council. We are a health research organization who is working in partnership with the Ministry of Health on the response to Coronavirus. We are contacting you because you participated in our survey on COVID-19 sometime last year. We would like to ask some additional questions about the Corona virus and your experiences during this time. There are no right or wrong answers and the answers you provide will not lead to any direct benefits or penalties for your household. The answers that you give provide us a better understanding of what people in your community have been experiencing so that the government and other partners can better respond. There are no risks or benefits to participating in this survey. Your participation is voluntary and you can stop the interview at any time if you do not wish to continue. After completing the survey we will send you 200/- via Mpesa to compensate you for your time, even if you stop in the middle.</p> <p><b>Ma nabad ba, Majiraga waa waayo imagaaci waa inn ka soo wacayo waayo hayada population council Waxaan nahay hayada ulaanran cilmi baarista darke caafimaadka oo waxaan la sheegayna waaanada caafimaadka ee ka hortaga cudurka corona viruska. Sababta aan kula soo xiriirno waxay tahay waxaad ka qayb qadhatay cilmi baarista COVID-19 sanadki la soo dhaafay. Waxaan jecleynay inaan ku weydiiro su'aalo dheeraad ah ee ku saabsan corona virus ka iyo khubadahaaga iala enegiga. Majiro jawab sax ah mise mid qatad ah ee jawabta aad nasiiiso majirto wax fadhayim toos aad ka helayso mise wax dhibato ah ka soo ganyeyn qoyska. Jawaabaha aad nasiiiso waxaan si fican uu fahmaynaa wax yarabaha dadka bulshadnima nagaalin ee dowlada iyo kuwa kale ee shirkada yihin ay sabbe fican haga hortagan Majiro qatayayn mise fadhayim ka qayb qadhatada cilmi baarista. Wax jojin karta waayayiga waadiga hadi aad rabin inaad waxbato. Su'aalyinka qaar waa waji ahaan iyo kuwa xasaa ah marka waan kugu waanaa laheynay inaad raadiiido mid shaqi ah inen ka dhameeyn cilmi baarista. Waxa ku qayb qadhatada maadka ah u ahaan inaad ka qayb qadhatid, leken go'anka kadhah hadi rabid inaad waxbato. Marka aad dhameeyn cilmi baarista waxaan uu dreynta walidkaaga qofka maadka ah 100 lacag ee dhanka mpeesa ee lagu mahad celiyayo waadiga. xita hadi aad waayayiga dhexta ugu tagto.</b></p> <p>If you have any questions about the survey in the future, please feel free to contact our office. I have the phone number and can give it to you if you would like.<br/>adi aad qabtid wax sualo oo kusabsan cilmi baarista wayaha dhambe, fadlan daaran xumimo inaad la xariito kafa kayna. Waxaan hayatelefon nambarka waana kusiin kara hadi aad rabtid.</p> <p>Do you have any questions?<br/>Myaad qabtaa wax sual ah? <span style="float: right;">No <b>Maya</b> 0<br/>Yes <b>Ha</b> 1</span></p> <p>Do you agree to participate?<br/>Ma opolaatay inaad kaqeyb qaadaato? <span style="float: right;">No <b>Maya</b> 0<br/>Yes <b>Haa</b> 1</span></p> <p>[Automatic fill in indicating that this is Round 2]<br/>[Confirm respondent using pre-pull from R1 - name, sex, age, location]</p> |   |                                                                                                                                                                                                                                                                                                                                                                                                                                                                                                                                                                                                                                                                                                                                                                    | END INTERVIEW                                                                                                                                                                                                                                                                                                                                                                                                                                                                                                                                                                                                                                                                                                                                                                                                                                                                                                                                                                                                                                                                                                                                                                                                                                                                                                                                                                                                                                                                                                                                                                                                                                                            |                    |         |  |  |  |  |  |  |  |  |  |  |  |  |  |  |  |  |  |  |  |
| 101b                                                                                                                                                                                                                                                                                                                                                                                                                                                                                                                                                                                                                                                                                                                                                                                                                                                                                                                                                                                                                                                                                                                                                                                                                                                                                                                                                                                                                                                                                                                                                                                                                                                                                                                                                                                                                                                                                                                                                                                                                                                                                                                                                                                                                                                                                                                                                                                                                                                                                                                                                                                                                                                                                                                                                                                                                                                                                                                                                                                                                                                                                                                                                                                                                                                                    | 1 | Are you the head of your household?<br>Ma waxaad tahay qofka masuul ka ah qoyskaagu?                                                                                                                                                                                                                                                                                                                                                                                                                                                                                                                                                                                                                                                                               | Yes <b>Haa</b><br>No <b>Maya</b>                                                                                                                                                                                                                                                                                                                                                                                                                                                                                                                                                                                                                                                                                                                                                                                                                                                                                                                                                                                                                                                                                                                                                                                                                                                                                                                                                                                                                                                                                                                                                                                                                                         | 1<br>0             |         |  |  |  |  |  |  |  |  |  |  |  |  |  |  |  |  |  |  |  |
| WAJ 1                                                                                                                                                                                                                                                                                                                                                                                                                                                                                                                                                                                                                                                                                                                                                                                                                                                                                                                                                                                                                                                                                                                                                                                                                                                                                                                                                                                                                                                                                                                                                                                                                                                                                                                                                                                                                                                                                                                                                                                                                                                                                                                                                                                                                                                                                                                                                                                                                                                                                                                                                                                                                                                                                                                                                                                                                                                                                                                                                                                                                                                                                                                                                                                                                                                                   | 2 | I want to know a bit about how many men, women, boys and girls live in this household. For each category, kindly tell me how many people live in this household, including yourself. EXPLAIN: 'live' is someone who sleeps in your house the majority of the nights of the week. EXPLAIN: 'household' is one that shares a kitchen (pot) and has the same head of household. <b>Waxaan raba inaan wax yar ka ogaado immisa raga, dumarka, wiilasha, iyo gabdaha ku nool qoyskan. Qoysb kasta, fadlan waxaad ii sheegta intaa qof oo ku nool qoyska oo aad adiga ka mid tahay. FAFAHIN: Qof ku nool waayay ka minka tahay intaa badan seendo guuriga habeenada ee isbuuci. FAFAHIN: Qoyska waayay ka minka tahay kuwa wadhaga jikada oo hal qof masuul ka yihay</b> | <div style="display: flex; justify-content: space-around;"> <div> <p><b>MALE RAGA</b></p> <p>Babies (0-4) <b>Dhalanka [0-4]</b></p> <p>Children (5-9) <b>Carurta [5-9]</b></p> <p>Adolescents (10-19) <b>Ooangarka [10-19]</b></p> <p>Adults (20-64) <b>Dadka waaweyn [20-24]</b></p> <p>Elderly (65+) <b>Waaeyelada (65+)</b></p> </div> <div> <table border="1"> <tr><td></td><td></td></tr> <tr><td></td><td></td></tr> <tr><td></td><td></td></tr> <tr><td></td><td></td></tr> <tr><td></td><td></td></tr> </table> </div> <div> <p><b>FEMALE DUMARKA</b></p> <table border="1"> <tr><td></td><td></td></tr> <tr><td></td><td></td></tr> <tr><td></td><td></td></tr> <tr><td></td><td></td></tr> <tr><td></td><td></td></tr> </table> </div> </div>                                                                                                                                                                                                                                                                                                                                                                                                                                                                                                                                                                                                                                                                                                                                                                                                                                                                                                                  |                    |         |  |  |  |  |  |  |  |  |  |  |  |  |  |  |  |  |  |  |  |
|                                                                                                                                                                                                                                                                                                                                                                                                                                                                                                                                                                                                                                                                                                                                                                                                                                                                                                                                                                                                                                                                                                                                                                                                                                                                                                                                                                                                                                                                                                                                                                                                                                                                                                                                                                                                                                                                                                                                                                                                                                                                                                                                                                                                                                                                                                                                                                                                                                                                                                                                                                                                                                                                                                                                                                                                                                                                                                                                                                                                                                                                                                                                                                                                                                                                         |   |                                                                                                                                                                                                                                                                                                                                                                                                                                                                                                                                                                                                                                                                                                                                                                    |                                                                                                                                                                                                                                                                                                                                                                                                                                                                                                                                                                                                                                                                                                                                                                                                                                                                                                                                                                                                                                                                                                                                                                                                                                                                                                                                                                                                                                                                                                                                                                                                                                                                          |                    |         |  |  |  |  |  |  |  |  |  |  |  |  |  |  |  |  |  |  |  |
|                                                                                                                                                                                                                                                                                                                                                                                                                                                                                                                                                                                                                                                                                                                                                                                                                                                                                                                                                                                                                                                                                                                                                                                                                                                                                                                                                                                                                                                                                                                                                                                                                                                                                                                                                                                                                                                                                                                                                                                                                                                                                                                                                                                                                                                                                                                                                                                                                                                                                                                                                                                                                                                                                                                                                                                                                                                                                                                                                                                                                                                                                                                                                                                                                                                                         |   |                                                                                                                                                                                                                                                                                                                                                                                                                                                                                                                                                                                                                                                                                                                                                                    |                                                                                                                                                                                                                                                                                                                                                                                                                                                                                                                                                                                                                                                                                                                                                                                                                                                                                                                                                                                                                                                                                                                                                                                                                                                                                                                                                                                                                                                                                                                                                                                                                                                                          |                    |         |  |  |  |  |  |  |  |  |  |  |  |  |  |  |  |  |  |  |  |
|                                                                                                                                                                                                                                                                                                                                                                                                                                                                                                                                                                                                                                                                                                                                                                                                                                                                                                                                                                                                                                                                                                                                                                                                                                                                                                                                                                                                                                                                                                                                                                                                                                                                                                                                                                                                                                                                                                                                                                                                                                                                                                                                                                                                                                                                                                                                                                                                                                                                                                                                                                                                                                                                                                                                                                                                                                                                                                                                                                                                                                                                                                                                                                                                                                                                         |   |                                                                                                                                                                                                                                                                                                                                                                                                                                                                                                                                                                                                                                                                                                                                                                    |                                                                                                                                                                                                                                                                                                                                                                                                                                                                                                                                                                                                                                                                                                                                                                                                                                                                                                                                                                                                                                                                                                                                                                                                                                                                                                                                                                                                                                                                                                                                                                                                                                                                          |                    |         |  |  |  |  |  |  |  |  |  |  |  |  |  |  |  |  |  |  |  |
|                                                                                                                                                                                                                                                                                                                                                                                                                                                                                                                                                                                                                                                                                                                                                                                                                                                                                                                                                                                                                                                                                                                                                                                                                                                                                                                                                                                                                                                                                                                                                                                                                                                                                                                                                                                                                                                                                                                                                                                                                                                                                                                                                                                                                                                                                                                                                                                                                                                                                                                                                                                                                                                                                                                                                                                                                                                                                                                                                                                                                                                                                                                                                                                                                                                                         |   |                                                                                                                                                                                                                                                                                                                                                                                                                                                                                                                                                                                                                                                                                                                                                                    |                                                                                                                                                                                                                                                                                                                                                                                                                                                                                                                                                                                                                                                                                                                                                                                                                                                                                                                                                                                                                                                                                                                                                                                                                                                                                                                                                                                                                                                                                                                                                                                                                                                                          |                    |         |  |  |  |  |  |  |  |  |  |  |  |  |  |  |  |  |  |  |  |
|                                                                                                                                                                                                                                                                                                                                                                                                                                                                                                                                                                                                                                                                                                                                                                                                                                                                                                                                                                                                                                                                                                                                                                                                                                                                                                                                                                                                                                                                                                                                                                                                                                                                                                                                                                                                                                                                                                                                                                                                                                                                                                                                                                                                                                                                                                                                                                                                                                                                                                                                                                                                                                                                                                                                                                                                                                                                                                                                                                                                                                                                                                                                                                                                                                                                         |   |                                                                                                                                                                                                                                                                                                                                                                                                                                                                                                                                                                                                                                                                                                                                                                    |                                                                                                                                                                                                                                                                                                                                                                                                                                                                                                                                                                                                                                                                                                                                                                                                                                                                                                                                                                                                                                                                                                                                                                                                                                                                                                                                                                                                                                                                                                                                                                                                                                                                          |                    |         |  |  |  |  |  |  |  |  |  |  |  |  |  |  |  |  |  |  |  |
|                                                                                                                                                                                                                                                                                                                                                                                                                                                                                                                                                                                                                                                                                                                                                                                                                                                                                                                                                                                                                                                                                                                                                                                                                                                                                                                                                                                                                                                                                                                                                                                                                                                                                                                                                                                                                                                                                                                                                                                                                                                                                                                                                                                                                                                                                                                                                                                                                                                                                                                                                                                                                                                                                                                                                                                                                                                                                                                                                                                                                                                                                                                                                                                                                                                                         |   |                                                                                                                                                                                                                                                                                                                                                                                                                                                                                                                                                                                                                                                                                                                                                                    |                                                                                                                                                                                                                                                                                                                                                                                                                                                                                                                                                                                                                                                                                                                                                                                                                                                                                                                                                                                                                                                                                                                                                                                                                                                                                                                                                                                                                                                                                                                                                                                                                                                                          |                    |         |  |  |  |  |  |  |  |  |  |  |  |  |  |  |  |  |  |  |  |
|                                                                                                                                                                                                                                                                                                                                                                                                                                                                                                                                                                                                                                                                                                                                                                                                                                                                                                                                                                                                                                                                                                                                                                                                                                                                                                                                                                                                                                                                                                                                                                                                                                                                                                                                                                                                                                                                                                                                                                                                                                                                                                                                                                                                                                                                                                                                                                                                                                                                                                                                                                                                                                                                                                                                                                                                                                                                                                                                                                                                                                                                                                                                                                                                                                                                         |   |                                                                                                                                                                                                                                                                                                                                                                                                                                                                                                                                                                                                                                                                                                                                                                    |                                                                                                                                                                                                                                                                                                                                                                                                                                                                                                                                                                                                                                                                                                                                                                                                                                                                                                                                                                                                                                                                                                                                                                                                                                                                                                                                                                                                                                                                                                                                                                                                                                                                          |                    |         |  |  |  |  |  |  |  |  |  |  |  |  |  |  |  |  |  |  |  |
|                                                                                                                                                                                                                                                                                                                                                                                                                                                                                                                                                                                                                                                                                                                                                                                                                                                                                                                                                                                                                                                                                                                                                                                                                                                                                                                                                                                                                                                                                                                                                                                                                                                                                                                                                                                                                                                                                                                                                                                                                                                                                                                                                                                                                                                                                                                                                                                                                                                                                                                                                                                                                                                                                                                                                                                                                                                                                                                                                                                                                                                                                                                                                                                                                                                                         |   |                                                                                                                                                                                                                                                                                                                                                                                                                                                                                                                                                                                                                                                                                                                                                                    |                                                                                                                                                                                                                                                                                                                                                                                                                                                                                                                                                                                                                                                                                                                                                                                                                                                                                                                                                                                                                                                                                                                                                                                                                                                                                                                                                                                                                                                                                                                                                                                                                                                                          |                    |         |  |  |  |  |  |  |  |  |  |  |  |  |  |  |  |  |  |  |  |
|                                                                                                                                                                                                                                                                                                                                                                                                                                                                                                                                                                                                                                                                                                                                                                                                                                                                                                                                                                                                                                                                                                                                                                                                                                                                                                                                                                                                                                                                                                                                                                                                                                                                                                                                                                                                                                                                                                                                                                                                                                                                                                                                                                                                                                                                                                                                                                                                                                                                                                                                                                                                                                                                                                                                                                                                                                                                                                                                                                                                                                                                                                                                                                                                                                                                         |   |                                                                                                                                                                                                                                                                                                                                                                                                                                                                                                                                                                                                                                                                                                                                                                    |                                                                                                                                                                                                                                                                                                                                                                                                                                                                                                                                                                                                                                                                                                                                                                                                                                                                                                                                                                                                                                                                                                                                                                                                                                                                                                                                                                                                                                                                                                                                                                                                                                                                          |                    |         |  |  |  |  |  |  |  |  |  |  |  |  |  |  |  |  |  |  |  |
|                                                                                                                                                                                                                                                                                                                                                                                                                                                                                                                                                                                                                                                                                                                                                                                                                                                                                                                                                                                                                                                                                                                                                                                                                                                                                                                                                                                                                                                                                                                                                                                                                                                                                                                                                                                                                                                                                                                                                                                                                                                                                                                                                                                                                                                                                                                                                                                                                                                                                                                                                                                                                                                                                                                                                                                                                                                                                                                                                                                                                                                                                                                                                                                                                                                                         |   |                                                                                                                                                                                                                                                                                                                                                                                                                                                                                                                                                                                                                                                                                                                                                                    |                                                                                                                                                                                                                                                                                                                                                                                                                                                                                                                                                                                                                                                                                                                                                                                                                                                                                                                                                                                                                                                                                                                                                                                                                                                                                                                                                                                                                                                                                                                                                                                                                                                                          |                    |         |  |  |  |  |  |  |  |  |  |  |  |  |  |  |  |  |  |  |  |
| 201                                                                                                                                                                                                                                                                                                                                                                                                                                                                                                                                                                                                                                                                                                                                                                                                                                                                                                                                                                                                                                                                                                                                                                                                                                                                                                                                                                                                                                                                                                                                                                                                                                                                                                                                                                                                                                                                                                                                                                                                                                                                                                                                                                                                                                                                                                                                                                                                                                                                                                                                                                                                                                                                                                                                                                                                                                                                                                                                                                                                                                                                                                                                                                                                                                                                     | 3 | The last time we interviewed you, you were living in [pre-pull from R1]. Are you still living in that location? If not, where are you living? <b>Marki ugu dambeysa aan kulaynaynaa waayay, waxaad degnedi/mesha iku soo bali doonta R1]. Myaad deganahin meshaa wali?</b><br>Hadi tahay maya, waga deganahin?<br><br><b>Read answer options aloud Kor u akhri jawab kasta</b>                                                                                                                                                                                                                                                                                                                                                                                     | <p>a. Have not moved <b>Ma guurin</b> 1</p> <p>b. Same county, rural location <b>Iala gobalka, miyaga</b> 2</p> <p>c. Same county, urban location <b>Iala gobalka, magalada</b> 3</p> <p>d. Other county, urban location <b>Gobaal kale, magalada kale</b> 4</p> <p>e. Other county, rural location <b>Gobaal kale, magalada kale</b> 5</p> <p>f. Other (specify) <b>Kuwa kale ( shag)</b> 6</p>                                                                                                                                                                                                                                                                                                                                                                                                                                                                                                                                                                                                                                                                                                                                                                                                                                                                                                                                                                                                                                                                                                                                                                                                                                                                         | 107                |         |  |  |  |  |  |  |  |  |  |  |  |  |  |  |  |  |  |  |  |
| 202                                                                                                                                                                                                                                                                                                                                                                                                                                                                                                                                                                                                                                                                                                                                                                                                                                                                                                                                                                                                                                                                                                                                                                                                                                                                                                                                                                                                                                                                                                                                                                                                                                                                                                                                                                                                                                                                                                                                                                                                                                                                                                                                                                                                                                                                                                                                                                                                                                                                                                                                                                                                                                                                                                                                                                                                                                                                                                                                                                                                                                                                                                                                                                                                                                                                     | 4 | Why did you leave [location R1]? <b>Maxaad uga tagtay</b><br><br>Do NOT read answer categories aloud <b>Ha u akhriin jawabaha kor</b>                                                                                                                                                                                                                                                                                                                                                                                                                                                                                                                                                                                                                              | <p>a. To get away from <b>Coronavirus</b> <b>foogada corona virus</b> 1</p> <p>b. Economic reasons (no food, no work, couldn't pay rent, etc.) <b>Sababoyin dhaqaale awoode ( Cunta )</b> 2</p> <p>c. To take care of my family that live here <b>Si aan u daryeelo qoyskeyga halkan ku nool.</b> 3</p> <p>d. Better place for my children <b>Meel wanagsan carurteyda</b> 4</p> <p>e. Other <b>kuwa kale</b> 9</p>                                                                                                                                                                                                                                                                                                                                                                                                                                                                                                                                                                                                                                                                                                                                                                                                                                                                                                                                                                                                                                                                                                                                                                                                                                                      |                    |         |  |  |  |  |  |  |  |  |  |  |  |  |  |  |  |  |  |  |  |
| COVID-19 RISK PERCEPTION, STIGMA AND PREVENTION                                                                                                                                                                                                                                                                                                                                                                                                                                                                                                                                                                                                                                                                                                                                                                                                                                                                                                                                                                                                                                                                                                                                                                                                                                                                                                                                                                                                                                                                                                                                                                                                                                                                                                                                                                                                                                                                                                                                                                                                                                                                                                                                                                                                                                                                                                                                                                                                                                                                                                                                                                                                                                                                                                                                                                                                                                                                                                                                                                                                                                                                                                                                                                                                                         |   |                                                                                                                                                                                                                                                                                                                                                                                                                                                                                                                                                                                                                                                                                                                                                                    |                                                                                                                                                                                                                                                                                                                                                                                                                                                                                                                                                                                                                                                                                                                                                                                                                                                                                                                                                                                                                                                                                                                                                                                                                                                                                                                                                                                                                                                                                                                                                                                                                                                                          |                    |         |  |  |  |  |  |  |  |  |  |  |  |  |  |  |  |  |  |  |  |
| 107                                                                                                                                                                                                                                                                                                                                                                                                                                                                                                                                                                                                                                                                                                                                                                                                                                                                                                                                                                                                                                                                                                                                                                                                                                                                                                                                                                                                                                                                                                                                                                                                                                                                                                                                                                                                                                                                                                                                                                                                                                                                                                                                                                                                                                                                                                                                                                                                                                                                                                                                                                                                                                                                                                                                                                                                                                                                                                                                                                                                                                                                                                                                                                                                                                                                     | 5 | Do you think your chance of getting infected with Corona is low, medium, or high, or do you have no risk at all? <b>Ma umaleneysa furista aad kugu dace kara corona inta ay tahay inn yar, dhexdhexaad, inn badan mise kuma sugnid qatar dhan?</b>                                                                                                                                                                                                                                                                                                                                                                                                                                                                                                                 | <p>Low <b>inn yar</b> 1</p> <p>Medium <b>dhexdhexaad</b> 2</p> <p>High <b>inn badan</b> 3</p> <p>No risk <b>kuma sugnid qatar</b> 4</p> <p>Already had Coronavirus <b>Horan buu igu dacaay corona virus</b> 5</p> <p>Don't know, no response <b>Maagi, Majiro jawab</b> 88</p>                                                                                                                                                                                                                                                                                                                                                                                                                                                                                                                                                                                                                                                                                                                                                                                                                                                                                                                                                                                                                                                                                                                                                                                                                                                                                                                                                                                           | 108a<br>204<br>204 |         |  |  |  |  |  |  |  |  |  |  |  |  |  |  |  |  |  |  |  |
| 108                                                                                                                                                                                                                                                                                                                                                                                                                                                                                                                                                                                                                                                                                                                                                                                                                                                                                                                                                                                                                                                                                                                                                                                                                                                                                                                                                                                                                                                                                                                                                                                                                                                                                                                                                                                                                                                                                                                                                                                                                                                                                                                                                                                                                                                                                                                                                                                                                                                                                                                                                                                                                                                                                                                                                                                                                                                                                                                                                                                                                                                                                                                                                                                                                                                                     | 6 | Why do you think you are not at high risk? <b>Maxay tahay sababta aad ugu maleysay inaad kusugnay qatar?</b><br><br>Do NOT read answer categories out loud<br><br><b>Note: Probe - anything else? Taariha: hoji zaid-jambo lingine?</b><br><br><b>Record all mentioned</b>                                                                                                                                                                                                                                                                                                                                                                                                                                                                                         | <p>a. I'm young <b>Waxaan ahaay dhaliyaro</b> 0 1</p> <p>b. God protects me <b>Ilaahay ayaal iilaayo</b> 0 1</p> <p>c. The hot weather/climate <b>Jaawiga/ cimilada kuuul</b> 0 1</p> <p>d. There is no more COVID <b>Majiro COVID-19</b> 0 1</p> <p>e. I haven't travelled <b>Safar ma galin</b> 0 1</p> <p>f. I am not a Mzungu or Chinese <b>Ma ihi caadan ama inda yarka</b> 0 1</p> <p>g. COVID is a lie/gov't just trying to get money <b>COVID was been / dowlada ayaal lacag ku raadsaney</b> 0 1</p> <p>h. Don't know anyone with Corona <b>Ma garanaya qof qaba corona</b> 0 1</p> <p>j. I have been staying at home <b>Guriga ayaan iska joogay</b> 0 1</p> <p>k. Have been adhering to government guidelines <b>Waxaan raacayay tilmaamaha dowlada</b> 0 1</p> <p>m. Practice social distancing/staying 1-2 meters apart/not shaking hands/not interacting with people <b>Waxaan ifaifnay maaalahada bulshada/Waxaan fogaanay 1-2 meter /waxaan joogi gacsaan salanta / ma dhexgato dadka</b> 0 1</p> <p>n. Have been washing hands with soap and running water/using sanitizer <b>Waxaan ku dhaganeysay gacmaha saabun iyo biyo socda / isiciimaalaya waayabaha lagu naadifado gacmaha</b> 0 1</p> <p>o. Have been wearing a face mask <b>Waxaan xirineysay maaska ee afka iyo naska</b> 0 1</p> <p>p. I am healthy <b>Waan caafimaad qabaa</b> 0 1</p> <p>l. Other <b>Kuwa kale</b> 0 1</p> <p>q. There is no Coronavirus in this county <b>Majiro corona virus wadankan</b> 0 1</p> <p>r. We will all get Corona at some point <b>Dhamantee waan nugu daci doona corona virus</b> 0 1</p> <p>s. Don't know/no response <b>Maagi, Majiro jawab</b> 0 1</p> | ALL<br>204         |         |  |  |  |  |  |  |  |  |  |  |  |  |  |  |  |  |  |  |  |
| 108a                                                                                                                                                                                                                                                                                                                                                                                                                                                                                                                                                                                                                                                                                                                                                                                                                                                                                                                                                                                                                                                                                                                                                                                                                                                                                                                                                                                                                                                                                                                                                                                                                                                                                                                                                                                                                                                                                                                                                                                                                                                                                                                                                                                                                                                                                                                                                                                                                                                                                                                                                                                                                                                                                                                                                                                                                                                                                                                                                                                                                                                                                                                                                                                                                                                                    | 7 | Why do you think you are at high risk? <b>Maxay tahay sababta aad ugu maleysay inaad ku sugantahay hals?</b><br><br>Do NOT read answer categories aloud <b>Ha u akhriin jawabaha kor</b>                                                                                                                                                                                                                                                                                                                                                                                                                                                                                                                                                                           | <p>a. Have been in contact with someone who is infected <b>Waxaan la kulme qof qabo cudurka</b> 0 1</p> <p>b. Travelled recently <b>Dhawaan aan safray</b> 0 1</p> <p>c. Health care worker <b>Shaqalaha daryelka caafimaadka</b> 0 1</p> <p>d. I interact with a lot of people every day <b>Waxaan la dhexgala dad badan maalin kasta</b> 0 1</p> <p>e. Ride public transportation a lot <b>waxaan inta badan raaca gaadidka dadweynaha</b> 0 1</p> <p>f. Am not able to wash my hands <b>Ma awoodo inaan dhacdo gacmaha</b> 0 1</p> <p>g. Am not able to wear a mask <b>Ma awoodo inaan xiro maaska</b> 0 1</p> <p>h. Am not able to follow government guidelines <b>Ma awoodo inaan raaco tilmaamaha dowlada</b> 0 1</p> <p>i. Am elderly <b>Waxaan ahaay qof da'a ah</b> 0 1</p> <p>j. Live in a place with crowded living conditions/shared toilets <b>Waxaan ku noolahay meel leh</b> 0 1</p>                                                                                                                                                                                                                                                                                                                                                                                                                                                                                                                                                                                                                                                                                                                                                                      | NOTES<br>204       |         |  |  |  |  |  |  |  |  |  |  |  |  |  |  |  |  |  |  |  |

|     |    |                                                                                                                                                                                                                                                                                                                                                                                                                                                                                                                                                                                                                                                                                                                                                          |                                                                                                                                                                                                                                                                                                                                                                                                                                                                                                                                                                                                                                                                                                                                                                                                                                                                                                                                                                                                                                                                                                                                                                                                                                                                                                                                                                                                                                                           |     |
|-----|----|----------------------------------------------------------------------------------------------------------------------------------------------------------------------------------------------------------------------------------------------------------------------------------------------------------------------------------------------------------------------------------------------------------------------------------------------------------------------------------------------------------------------------------------------------------------------------------------------------------------------------------------------------------------------------------------------------------------------------------------------------------|-----------------------------------------------------------------------------------------------------------------------------------------------------------------------------------------------------------------------------------------------------------------------------------------------------------------------------------------------------------------------------------------------------------------------------------------------------------------------------------------------------------------------------------------------------------------------------------------------------------------------------------------------------------------------------------------------------------------------------------------------------------------------------------------------------------------------------------------------------------------------------------------------------------------------------------------------------------------------------------------------------------------------------------------------------------------------------------------------------------------------------------------------------------------------------------------------------------------------------------------------------------------------------------------------------------------------------------------------------------------------------------------------------------------------------------------------------------|-----|
|     |    |                                                                                                                                                                                                                                                                                                                                                                                                                                                                                                                                                                                                                                                                                                                                                          | <p><i>durufo nololeed oo dadku badan yahay / Musqulaha la wadaago</i></p> <p>j. Handle cash Waxaan qabte lacag caadan ah 0 1</p> <p>k. Am sick/have a health condition Waan xanuunsanahay / Waxaan qaba xaalad caafimaad 0 1</p> <p>l. Someone in my household is high risk (for any reason) Qof ka mid qoyskeega ayaa halis ku sugan [sababti ahataba] 0 1</p> <p>m. Live in or near a hotspot/place with many confirmed cases Waxaan ku noolahay u dhowahay meelaha qatarla ah / mise meelaha ugu badan manalada la xaqiijiyey 0 1</p> <p>n. My kids are back in school Carurteyda waxay ku labten skuulka 0 1</p> <p>o. I have gone back to work Waxan ku labte shaqo 0 1</p> <p>p. Other (specify) Kuwa (shag) 0 1</p>                                                                                                                                                                                                                                                                                                                                                                                                                                                                                                                                                                                                                                                                                                                                |     |
| 204 | 8  | <p>Do you know anyone in your family, neighborhood or workplace who has been infected with the Coronavirus? Your answer is confidential and no action will be taken based on your answer. Would you say: Adhiga magaraneysa qof [qoyskinta, daariga ama mesha shaqada] uu ku dacey corona virus? Jawaabtaada waa sir ah oo ficilna kuma salaysanaan doona jawaabtaada. Miyaad dihi lahad:</p> <p>Read answer options aloud Kor u akhri jawabaha</p>                                                                                                                                                                                                                                                                                                      | <p>a. Yes, I know someone who tested positive Haa, waxaan garanayaa qof laga layah cudurka corona virus 1</p> <p>b. Yes, I know someone who is suspected of being positive but hasn't gone for a test Haa, waxaan garanayaa qof looga shakisan yahay corona virus lakin aan iska caabin 2</p> <p>c. No, I don't know anyone Maya, Oofna garan maayo 3</p>                                                                                                                                                                                                                                                                                                                                                                                                                                                                                                                                                                                                                                                                                                                                                                                                                                                                                                                                                                                                                                                                                                 | 302 |
| 501 | 9  | <p>Who had Coronavirus? Yaa qaaba corona virus?</p>                                                                                                                                                                                                                                                                                                                                                                                                                                                                                                                                                                                                                                                                                                      | <p>a. Me Aniga No Yes 0 1</p> <p>b. Someone in my family Qof la mid qarabadeyda 0 1</p> <p>c. Someone in a friend's family Qof ka mid ah qarabada xawbadiy 0 1</p> <p>d. Someone in my neighborhood/community Qof ka mid ah daarigaaga / bulshadeyda 0 1</p> <p>e. My friend Saadkiy 0 1</p> <p>f. Co worker Qof aan isla shaqayno 0 1</p> <p>g. Someone at a child's school Qof kujira skuulka cunugeyga 0 1</p> <p>h. Someone else Qof kale 0 1</p> <p>i. Refuse Wan diidhe inaan ka jawabo 0 1</p>                                                                                                                                                                                                                                                                                                                                                                                                                                                                                                                                                                                                                                                                                                                                                                                                                                                                                                                                                     |     |
| 302 | 10 | <p>Now I want you to imagine that people suspected that you were infected with Coronavirus, or that you have tested positive for Coronavirus. How do you think that people in your family and neighborhood would treat you. For each statement tell me if you think it's true or false. Hada waxaan rabaa inaad qiyaastid inn dadku aya kaga shakisan yahin inuu kugu dhacay corona virus ama laga helay corona virus. Siiwed u malayniyaan in dadka qoyskaaga ama daarsigaaga ay kuula dhaqmayaan. Qoraal kasta il shag hadi aad u malayniyo may run tahay ama been.</p>                                                                                                                                                                                | <p>a. People would stop talking to me Dadka waxay iska reeban inay is la hadan FALSE TRUE 0 1</p> <p>b. People would gossip about me Dadku way liga shekaynan 0 1</p> <p>c. People I know would bring me food I need Dad aan garanayo ayaa li keena cuntoada aan uu bahamay 0 1</p> <p>d. People I know would bring me the medicines I need Dad aan garanayo ayaa li keena dawaada aan uu bahamay 0 1</p> <p>e. People in the community would treat my family badly Dadka bulshada dhexdedha ayaa si xun ulaa dhaqma qarabadeyda 0 1</p> <p>f. After I have recovered from Corona virus, people in the community would still avoid me Kadib marka aan corona virus ka bogsooday, dadka bulshada dhexdedha ayaa weli iliga fogaanay 0 1</p> <p>g. After I have recovered from Coronavirus, I would not be welcome back into my house by family 0 1</p> <p>h. After I have recovered from Coronavirus, I would not be welcome back at my place of work Kadib marka aan ka bogsooday corona virus weli ilma o'goola inaan taago mesha shaqada 0 1</p> <p>i. After I have recovered from Coronavirus I would still not be welcome back to my place of working Kadib marka aan ka bogsooday corona virus weli ilma o'goola inaan ku dhukado masaajida 0 1</p> <p>j. After I have recovered from Coronavirus my child would not be welcomed back to school Kadib marka aan ka bogsooday corona virus cunugeyga weli ilma o'goola inn u ku labto skuulka 0 1</p> |     |
| 502 | 11 | <p>How true are the following sentences describing the people in your community? Side ay ruun u yihiin qoraalka soo socda ee shakaya dadka ka tirsan bulshadada?</p> <p>People in my community are taking steps to protect themselves and others from coronavirus (COVID-19). Would you say: Very true, somewhat true, not very true, not true at all. Dadkanool bulshadeyda aya qadiyaya tilaaboyin ay iskaga laalinayaan nafaqada iyo kuwa kale corona virus ka (COVID-19) . Miyaad dihi lahayd : Ruun ma ahan dhamaan, Waxay ruun , Aad ruun ma ahan , Ruun ma ahan dhamaan</p>                                                                                                                                                                       | <p>a. Very true Aad ba ruun utahay 1</p> <p>b. Somewhat true Waxay ruun 2</p> <p>c. Not very true Aad ruun ma ahan 3</p> <p>d. Not true at all Ruun ma ahan dhamaan 4</p>                                                                                                                                                                                                                                                                                                                                                                                                                                                                                                                                                                                                                                                                                                                                                                                                                                                                                                                                                                                                                                                                                                                                                                                                                                                                                 |     |
| 503 | 12 | <p>People in my community are angry about the social distancing measures put in place due to coronavirus (COVID-19). Would you say very true, somewhat true, not very true or not true at all. Dadka ku nool bulshadeyda waxay ka xanaqan wax ku saban tilmahaha ee kala fogashada ee corona virus ka awoode ( COVID-19 ) . Miyaad dihi lahayd : Ruun ma ahan dhamaan, Waxay ruun , Aad ruun ma ahan , Ruun ma ahan dhamaan</p>                                                                                                                                                                                                                                                                                                                          | <p>a. Very true Aad ba ruun utahay 1</p> <p>b. Somewhat true Waxay ruun 2</p> <p>c. Not very true Aad ruun ma ahan 3</p> <p>d. Not true at all Ruun ma ahan dhamaan 4</p>                                                                                                                                                                                                                                                                                                                                                                                                                                                                                                                                                                                                                                                                                                                                                                                                                                                                                                                                                                                                                                                                                                                                                                                                                                                                                 |     |
| 504 | 13 | <p>People in my community work together to prevent and fight the coronavirus (COVID-19). Would you say: Very true, somewhat true, not very true, not true at all. Dadka ku nool bulshadeyda waa isla ahaayaa si ay ugu hortaga oo ula dagaalan corona virus ka ( COVID-19 ) . Miyaad dihi lahayd : Ruun ma ahan dhamaan, Waxay ruun , Aad ruun ma ahan , Ruun ma ahan dhamaan.</p>                                                                                                                                                                                                                                                                                                                                                                       | <p>a. Very true Aad ba ruun utahay 1</p> <p>b. Somewhat true Waxay ruun 2</p> <p>c. Not very true Aad ruun ma ahan 3</p> <p>d. Not true at all Ruun ma ahan dhamaan 4</p>                                                                                                                                                                                                                                                                                                                                                                                                                                                                                                                                                                                                                                                                                                                                                                                                                                                                                                                                                                                                                                                                                                                                                                                                                                                                                 |     |
| 505 | 14 | <p>Would you say that the current government guidance/regulation on COVID-19 are very easy to follow, somewhat easy to follow, somewhat difficult to follow or very difficult to follow? Miyaad dihi lahayd tilmahaha / shariga dawlada ee COVID-19. Aad ba u fudud yihiin inn la raaco, waxay ay fudud yihiin inn la raaco, waxay ay adheg yihiin inn la raaco, Aad ba u adheg yihiin inn la raaco.</p>                                                                                                                                                                                                                                                                                                                                                 | <p>a. Very easy to follow Aad ba u fudud yihiin inn la raaco 1</p> <p>b. Somewhat easy to follow waxay ay fudud yihiin inn la raaco 2</p> <p>c. Somewhat difficult to follow waxay ay adheg yihiin inn la raaco 3</p> <p>d. Very difficult to follow Aad ba u adheg yihiin inn la raaco, 4</p>                                                                                                                                                                                                                                                                                                                                                                                                                                                                                                                                                                                                                                                                                                                                                                                                                                                                                                                                                                                                                                                                                                                                                            |     |
| 506 | 15 | <p>Now I want to ask you a few questions about a Coronavirus vaccine. As you may know, several vaccines that protect you from Coronavirus have been developed and approved, although they are not yet in Kenya. When the vaccine becomes available here, how likely is it that you would get the vaccine. Would you say very likely, somewhat likely, somewhat unlikely, very unlikely. Hada waxaan raba inaan ku weydio su'aalo yar oo ku saban tallaalka corona virus ka. Sidaad ogtahay waxa soo saare oo la oggolaaday dhowr tallaa oo ka dhifaaqaya corona virus ka, Lakin weli so ma gaarin Kenya. Sida u badan tahay inaad heli karto tallaalka. Miyaad dihi lahayd aad ba u badan tahay, waxay ay badan tahay, waxay ma badno, aad uma badno</p> | <p>a. Very likely aad ba u badan tahay 1</p> <p>b. Somewhat likely waxay ay badan tahay 2</p> <p>c. Somewhat unlikely waxay ma badno 3</p> <p>d. Very unlikely aad uma badno 4</p> <p>e. Don't know Maagi 5</p>                                                                                                                                                                                                                                                                                                                                                                                                                                                                                                                                                                                                                                                                                                                                                                                                                                                                                                                                                                                                                                                                                                                                                                                                                                           |     |
| 507 | 16 | <p>If the Coronavirus vaccine would be available for free, how likely is it that you would get it. Would you say very likely, somewhat likely, somewhat unlikely or very unlikely? Hadii tallaalka corona virus ka uu bilaash ahan tahay, sida u badan tahay inaad heli karto. Miyaad dihi lahayd aad ba u badan tahay, waxay ay badan tahay, waxay ma badno, aad uma badno</p>                                                                                                                                                                                                                                                                                                                                                                          | <p>a. Very likely aad ba u badan tahay 1</p> <p>b. Somewhat likely waxay ay badan tahay 2</p> <p>c. Somewhat unlikely waxay ma badno 3</p> <p>d. Very unlikely aad uma badno 4</p> <p>e. Don't know Maagi 5</p>                                                                                                                                                                                                                                                                                                                                                                                                                                                                                                                                                                                                                                                                                                                                                                                                                                                                                                                                                                                                                                                                                                                                                                                                                                           |     |
| 508 | 17 | <p>Which are some of the reasons that may keep you from getting the vaccine Maxay yihiin sababaha qaarkood ee ka rebaya inaan qaadatid tallaalka.</p> <p>Read all answer options aloud Kor u akhri dhamaan jawabaha</p>                                                                                                                                                                                                                                                                                                                                                                                                                                                                                                                                  | <p>a. I do not trust the vaccine Ma aaminsani tallaalka No Yes 0 1</p> <p>b. I worry about the side effects Waxan ka walwalsanahay dhibaatooyinka ka il maadhi doona 0 1</p> <p>c. I will not be able to afford it Ma awoodi inaan iibasado 0 1</p> <p>d. I am not worried that I will get infected with Coronavirus Kama walwalsanay inu igu dhici corona vir 0 1</p> <p>e. I do not think the vaccine will be effective Uma maleynayo in tallaalka waxtar yeelan doono 0 1</p> <p>f. I am too busy to get vaccinated Aad ba uga mashquul inaan qasato tallaalka 0 1</p> <p>g. I am afraid that I will get infected with Coronavirus if I get vaccinated Waan baqay inu corona virus 0 1</p> <p>h. It will be hard for me to access the place where I can get vaccinated Waa igu adheg tahay inaan h 0 1</p> <p>i. Other (specify) Kuwa kale (shag) 0 1</p> <p>j. I am worried of needles / jabs Waan ka baago cabsiga / baritanka 0 1</p> <p>k. For religious and cultural reasons Sababo diinta iyo dhawqanka awoode 0 1</p>                                                                                                                                                                                                                                                                                                                                                                                                                           |     |
| 509 | 18 | <p>If the vaccine was available for free here in Kenya, how likely is it that you would take your kids to get the vaccine that protects them from getting Coronavirus. Would you say very likely, somewhat likely, somewhat unlikely, or very unlikely? Hadii tallaalka uu bilaash ahan tahay halkan Kenya, sidhu u badan tahay inaad qaadi lahayd aad ba u badan tahay, waxay ay badan tahay, waxay ma badno, aad uma badno</p>                                                                                                                                                                                                                                                                                                                         | <p>a. Very likely aad ba u badan tahay 1</p> <p>b. Somewhat likely waxay ay badan tahay 2</p>                                                                                                                                                                                                                                                                                                                                                                                                                                                                                                                                                                                                                                                                                                                                                                                                                                                                                                                                                                                                                                                                                                                                                                                                                                                                                                                                                             |     |

BMJ Publishing Group Limited (BMJ) disclaims all liability and responsibility arising from any reliance placed on this supplemental material which has been supplied by the author(s)

|                                                              |       |                                                                                                                                                                                                                                                                                                                                                                                                                                                                                                                                                                                                                                                                                                                                                                                                                                                                                  |                                                                                                                                                                                                                                                                                                                                                                                                                                                                                                                                                                                                                                                                                                                                                                                                                                                                                                                                                                                                                                                                                                                                                                                                                                                                                                                                                                                                                                                                                                                                                                                                                                                                                                                                                                                                                                                                                                                                                                                                                                                                                                 |                                             |  |  |
|--------------------------------------------------------------|-------|----------------------------------------------------------------------------------------------------------------------------------------------------------------------------------------------------------------------------------------------------------------------------------------------------------------------------------------------------------------------------------------------------------------------------------------------------------------------------------------------------------------------------------------------------------------------------------------------------------------------------------------------------------------------------------------------------------------------------------------------------------------------------------------------------------------------------------------------------------------------------------|-------------------------------------------------------------------------------------------------------------------------------------------------------------------------------------------------------------------------------------------------------------------------------------------------------------------------------------------------------------------------------------------------------------------------------------------------------------------------------------------------------------------------------------------------------------------------------------------------------------------------------------------------------------------------------------------------------------------------------------------------------------------------------------------------------------------------------------------------------------------------------------------------------------------------------------------------------------------------------------------------------------------------------------------------------------------------------------------------------------------------------------------------------------------------------------------------------------------------------------------------------------------------------------------------------------------------------------------------------------------------------------------------------------------------------------------------------------------------------------------------------------------------------------------------------------------------------------------------------------------------------------------------------------------------------------------------------------------------------------------------------------------------------------------------------------------------------------------------------------------------------------------------------------------------------------------------------------------------------------------------------------------------------------------------------------------------------------------------|---------------------------------------------|--|--|
| 225                                                          | 36    | What is the one biggest need that you have at this time that is not being addressed? <i>Waa maxay baahida ugu weyn ee ku haysto hada oo aan wax laga qabarin</i>                                                                                                                                                                                                                                                                                                                                                                                                                                                                                                                                                                                                                                                                                                                 | a. Food <i>Cunto</i> 1<br>b. Cash <i>Lacag caadana ah</i> 2<br>c. Shelter <i>Hogga</i> 3<br>d. Water <i>Biyo</i> 4<br>e. Soap/hand sanitizer <i>Sabuun/ wayabaha gacmaha lagu dhaqda</i> 5<br>f. Medical care/medicine <i>Daryeel caafimaad / daawada</i> 6<br>g. Sanitary Towels <i>Shukumaan nafaqada</i> 7<br>h. Other <i>Kuwa kale</i> 77                                                                                                                                                                                                                                                                                                                                                                                                                                                                                                                                                                                                                                                                                                                                                                                                                                                                                                                                                                                                                                                                                                                                                                                                                                                                                                                                                                                                                                                                                                                                                                                                                                                                                                                                                   |                                             |  |  |
| WAJ 3                                                        | 7 37  | Have you visited a health facility in the past three months? <i>Ma booqday xarunta caafimaadka sedaxda blood ee la soo dhaafay</i>                                                                                                                                                                                                                                                                                                                                                                                                                                                                                                                                                                                                                                                                                                                                               | No <i>Maya</i> 0<br>Yes <i>Haa</i> 1                                                                                                                                                                                                                                                                                                                                                                                                                                                                                                                                                                                                                                                                                                                                                                                                                                                                                                                                                                                                                                                                                                                                                                                                                                                                                                                                                                                                                                                                                                                                                                                                                                                                                                                                                                                                                                                                                                                                                                                                                                                            | 226                                         |  |  |
| WAJ 4                                                        | 8 38  | I'm going to ask you some questions about your experience at the health facility. For each one tell me if it was true or false. <i>Waxaan ku weydin doonaa su'aalo qaar oo ku saban khbradaada ee xarunta caafimaadka. Mid kasta waxaad ii sheegda inay tahay ruun ama been</i>                                                                                                                                                                                                                                                                                                                                                                                                                                                                                                                                                                                                  | a. I was satisfied with my visit to the health facility <i>Waan ku qancay booqashada xarunta caafimaadka</i> FALSE TRUE 0 1<br>b. I received the medical attention that I was seeking <i>Waxaan helay daryeel caafimaad oo aan raadinayay</i> 0 1<br>c. There was a hand washing station with soap and water at the health facility <i>Meesha gacmaha lagu dhaqda ayaa ku taala xarunta caafimaadka</i> 0 1<br>d. Health care providers were wearing masks <i>Biixiyaasha daryeelka caafimaadka waxay ximaayeen maaska</i> 0 1<br>e. The service/commodity that I went for was not available <i>Adweega / badeecada aan u tegay lama helin.</i> 0 1<br>f. I was not able to receive services because of the health workers strike <i>Ma awoodin inaan helo</i>                                                                                                                                                                                                                                                                                                                                                                                                                                                                                                                                                                                                                                                                                                                                                                                                                                                                                                                                                                                                                                                                                                                                                                                                                                                                                                                                  |                                             |  |  |
| EFFECTS OF COVID-19 MITIGATION MEASURES                      |       |                                                                                                                                                                                                                                                                                                                                                                                                                                                                                                                                                                                                                                                                                                                                                                                                                                                                                  |                                                                                                                                                                                                                                                                                                                                                                                                                                                                                                                                                                                                                                                                                                                                                                                                                                                                                                                                                                                                                                                                                                                                                                                                                                                                                                                                                                                                                                                                                                                                                                                                                                                                                                                                                                                                                                                                                                                                                                                                                                                                                                 |                                             |  |  |
| 226                                                          | 39    | I want to ask a few more questions about how the Coronavirus pandemic, and the responses of the government and others to try prevent the spread of Coronavirus, may have affected you. Your responses will not have an effect on anything you may receive, so please answer as honestly as possible. In the past two weeks, have you experienced any of the following as compared to before the Coronavirus started? <i>Waxaan rabaa inaan kuweydiiyo su'aalo kale oo dheeri ah oo ku saban sida cudurka ee masibada corona virus iyo ka hortaga say dowlada iyo kuwa kale uu kuugu faafin corona virus. Jawaabahaagu ma ku leh saameen wax ad heli lahe, marka fadhiin ugu jawab sida ugu maqoolista adhigo dawladda ah. Labada isbuuc ee la soo dhaafay, miyaad la kulantay mid ka mid ah wayaybahaan soo socda marka la barbar dhigo ka hor intaan corona virus bilaabin?</i> | a. See my family less <i>Waxaan arka qoyskeega in yar</i> NO YES 0 1<br>b. See my friends less <i>Waxaan arka asxaabtayda in yar</i> 0 1<br>c. Avoid public transport <i>Waxaan iskalaali gaadidka dadweynaha</i> 0 1<br>d. Complete loss of job/income <i>Gebi ahan waxaan wayeey shaqo / dagalaha</i> 0 1<br>e. Partial loss of job/income <i>Waxaan wayeey qeyb ka mid dhaqdhaqaaqa</i> 0 1<br>f. Increased expenses for the household <i>Waxaa korday qarashka qoyska</i> 0 1<br>g. More time spent cooking for the household <i>Waxaan ku qaata waqti dheeri ah ee karinta cunada qoyska</i> 0 1<br>h. More time spent cleaning the house <i>Waxaan ku qaata waqti dheeri ah ee naafadinta guriga</i> 0 1<br>i. More time spent taking care of children <i>Waxaan ku qaata waqti dheeri ah ee daryeelka carurta</i> 0 1<br>j. More time spent taking care of livestock/farming <i>Waxaan ku qaata waqti dheeri ah ee daryeelka xoolaha/ miyiga</i> 0 1<br>k. More time fetching water <i>Waxaan ku qaata waqti badan biyo dhawis</i> 0 1<br>l. More tensions in the household <i>Waxaa jira xiisadaha badan qoyska</i> 0 1<br>m. More arguing in the household <i>Dood badan reerka</i> 0 1<br>n. Increase of crime in your neighborhood? <i>Waxaa korday dembika ee dariska</i> 0 1<br>o. Experienced more violence outside the house? <i>Khbrad dheeraad ah kala kulmeysa banaanka guriga</i> 0 1<br>p. More fear that your partner will harm you <i>Waxaan ka cabsi qaba in lamnaanaagu wayeelo uu geysto</i> 0 1<br>q. Experienced more violence inside the household? <i>Khbrad dheeraad ah aan kala kulma guriga dhexiisa</i> 0 1<br>r. Not accessing health care/services/medicines that you would have otherwise needed <i>Ma heli karo daryeel caafimaad/ adeegyo / dawo oo aan u baharay</i> 0 1<br>s. Increase in food prices <i>waxaa korday qiimaha cunada</i> 0 1<br>t. Increase in the cost of cooking fuel <i>Waxaa korday qiimaha shidaalka dhabka</i> 0 1<br>u. Less time spent praying <i>Waxaan waqti yar ku qaata tuukashada</i> 0 1<br>v. Other <i>Kuwa kale</i> 0 1 | code to give ref<br>if NO, SKIP<br>WAJ<br>9 |  |  |
| READ ALL ANSWERS ALOUD <i>Kor u akhri dhamaan su'aalaha</i>  |       |                                                                                                                                                                                                                                                                                                                                                                                                                                                                                                                                                                                                                                                                                                                                                                                                                                                                                  |                                                                                                                                                                                                                                                                                                                                                                                                                                                                                                                                                                                                                                                                                                                                                                                                                                                                                                                                                                                                                                                                                                                                                                                                                                                                                                                                                                                                                                                                                                                                                                                                                                                                                                                                                                                                                                                                                                                                                                                                                                                                                                 |                                             |  |  |
| 319                                                          | 40    | What is the main reason that you skipped health services? <i>Maxay tahay sababta ugu weyn ee aad uu taagi weyde adeegyada caafimaadka?</i>                                                                                                                                                                                                                                                                                                                                                                                                                                                                                                                                                                                                                                                                                                                                       | a. The clinics are closed because of Coronavirus <i>Clinic yada waa taxire corona virus daaris</i> NO/YES 0 1<br>b. People will think I have Corona if I go to the clinic <i>Hadii aan taago clinic ga dadka waxay uu maleynayaan inn aan qaabo corona</i> 0 1<br>c. I am scared that I will get infected with Coronavirus if I go to the clinic <i>Hadii aan taago clinic ga waxaan ka baqaa inaan ugu daaco corona virus</i> 0 1<br>d. I cannot afford the cost of health care services right now <i>Ma awoodi qarashka adeegyada caafimaadka hada</i> 0 1<br>e. I did not want to leave the house because of the curfew <i>Ma aanan dooneyn inaan ka baxo guriga bandow daaris</i> 0 1<br>f. The health facilities do not have the medication I need <i>Xarunta caafimaadka ma hayaa daawada aan uu baahinay</i> 0 1<br>g. The health facilities are only seeing a small number of patients each day <i>Xarunta caafimaadka waxa kali ankayn tiro yar ee bukaanada maaliinti</i> 0 1<br>h. The health care workers strike <i>Shaqalaha daryeelka caafimaadka waxay sameeyeen shaqo jojin</i> 0 1<br>i. Other (specify) <i>Kuwa kale (sheg)</i> 0 1                                                                                                                                                                                                                                                                                                                                                                                                                                                                                                                                                                                                                                                                                                                                                                                                                                                                                                                                           |                                             |  |  |
| 227                                                          | 41    | Which health care/services/medicines have you given up? <i>Mayaad iska dhaafay daryeelka caafimaadka /adeegyada /daawoyin?</i>                                                                                                                                                                                                                                                                                                                                                                                                                                                                                                                                                                                                                                                                                                                                                   | a. Check/medicine for malaria <i>Baartanka / dawo kanecada</i> NO YES 0 1<br>b. Check/medicine for stomach/digestive problems <i>Baartanka / daawada caloosha / dhibaatada dheef shidka</i> 0 1<br>c. Check/medicine for diabetes/blood pressure <i>Baartanka / daawada sokorowga / dhiig kar</i> 0 1<br>d. Care for any acute illness; Daryeelka cudur kaasta oo deg deg ah 0 1<br>e. Refills of any other regular medications you may take; Dawooyinka kale ee caadiga ah ee aad qaadan karto 0 1<br>f. Immunizations/nutrition services for children; Talaalka /adeegyada nafaqada ee carurta 0 1<br>g. Check/medicine for pre-natal care (only women) <i>Baartanka / dawo loogu tala galay daryeelka dhalmada kahor (dumarka kaliya)</i> 0 1<br>h. Family Planning/Child spacing methods (only women) <i>Habka kala deryenta ilmaha ( dumarka kaliya)</i> 0 1<br>i. Other <i>Kuwa kale</i> 0 1                                                                                                                                                                                                                                                                                                                                                                                                                                                                                                                                                                                                                                                                                                                                                                                                                                                                                                                                                                                                                                                                                                                                                                                              |                                             |  |  |
| CHILD MARRIAGE                                               |       |                                                                                                                                                                                                                                                                                                                                                                                                                                                                                                                                                                                                                                                                                                                                                                                                                                                                                  |                                                                                                                                                                                                                                                                                                                                                                                                                                                                                                                                                                                                                                                                                                                                                                                                                                                                                                                                                                                                                                                                                                                                                                                                                                                                                                                                                                                                                                                                                                                                                                                                                                                                                                                                                                                                                                                                                                                                                                                                                                                                                                 |                                             |  |  |
| WAJ 9                                                        | 9 42  | Has anyone in your household gotten married since the start of Coronavirus? <i>Miyuu jiraa qof kamid qoyskaaga oo guursaday sidhuu uu bilowde corona virus</i>                                                                                                                                                                                                                                                                                                                                                                                                                                                                                                                                                                                                                                                                                                                   | a. No <i>Maya</i> 0<br>b. Yes <i>Haa</i> 1                                                                                                                                                                                                                                                                                                                                                                                                                                                                                                                                                                                                                                                                                                                                                                                                                                                                                                                                                                                                                                                                                                                                                                                                                                                                                                                                                                                                                                                                                                                                                                                                                                                                                                                                                                                                                                                                                                                                                                                                                                                      | 415                                         |  |  |
| Programming: If Yes, ask how many and loop 43-46 accordingly |       |                                                                                                                                                                                                                                                                                                                                                                                                                                                                                                                                                                                                                                                                                                                                                                                                                                                                                  |                                                                                                                                                                                                                                                                                                                                                                                                                                                                                                                                                                                                                                                                                                                                                                                                                                                                                                                                                                                                                                                                                                                                                                                                                                                                                                                                                                                                                                                                                                                                                                                                                                                                                                                                                                                                                                                                                                                                                                                                                                                                                                 |                                             |  |  |
| WAJ 10                                                       | 10 43 | Who got married? <i>Yaa guursaday?</i>                                                                                                                                                                                                                                                                                                                                                                                                                                                                                                                                                                                                                                                                                                                                                                                                                                           | a. Son <i>Wii</i> 1<br>b. Daughter <i>Gabar</i> 2<br>c. Self <i>Nafaqada</i> 3<br>d. Other female (specify) <i>Naag kale (sheg)</i> 4<br>e. Other male (specify) <i>Nin kale (sheg)</i> 5                                                                                                                                                                                                                                                                                                                                                                                                                                                                                                                                                                                                                                                                                                                                                                                                                                                                                                                                                                                                                                                                                                                                                                                                                                                                                                                                                                                                                                                                                                                                                                                                                                                                                                                                                                                                                                                                                                       |                                             |  |  |
| WAJ 11                                                       | 11 44 | About how old is the person who got married? <i>Immitsa jir weye qofka guursaday ?</i>                                                                                                                                                                                                                                                                                                                                                                                                                                                                                                                                                                                                                                                                                                                                                                                           | AGE IN YEARS <table border="1" style="display: inline-table; vertical-align: middle;"> <tr> <td style="width: 20px; height: 20px;"></td> <td style="width: 20px; height: 20px;"></td> </tr> </table> DON'T KNOW <i>Maagi</i> 88                                                                                                                                                                                                                                                                                                                                                                                                                                                                                                                                                                                                                                                                                                                                                                                                                                                                                                                                                                                                                                                                                                                                                                                                                                                                                                                                                                                                                                                                                                                                                                                                                                                                                                                                                                                                                                                                 |                                             |  |  |
|                                                              |       |                                                                                                                                                                                                                                                                                                                                                                                                                                                                                                                                                                                                                                                                                                                                                                                                                                                                                  |                                                                                                                                                                                                                                                                                                                                                                                                                                                                                                                                                                                                                                                                                                                                                                                                                                                                                                                                                                                                                                                                                                                                                                                                                                                                                                                                                                                                                                                                                                                                                                                                                                                                                                                                                                                                                                                                                                                                                                                                                                                                                                 |                                             |  |  |

|                                                                                                                                                                                                                                                                                                                                                                                                                                                                                                                                                                                                                                                                                                                                                                                                                                                                                                                                                                                                                                                                                                                                                                                                                                                    |       |                                                                                                                                                                                                                                                                                                                                                                                                                                                                                                                                                                                                                                                                                                                                      |                                                                                                                                                                                                                                                                                                                                                                                                                                                                                                                                                                                                                                                                                                                                                                                                                                                                                                                                                                                                                                                                                                                                               |                   |
|----------------------------------------------------------------------------------------------------------------------------------------------------------------------------------------------------------------------------------------------------------------------------------------------------------------------------------------------------------------------------------------------------------------------------------------------------------------------------------------------------------------------------------------------------------------------------------------------------------------------------------------------------------------------------------------------------------------------------------------------------------------------------------------------------------------------------------------------------------------------------------------------------------------------------------------------------------------------------------------------------------------------------------------------------------------------------------------------------------------------------------------------------------------------------------------------------------------------------------------------------|-------|--------------------------------------------------------------------------------------------------------------------------------------------------------------------------------------------------------------------------------------------------------------------------------------------------------------------------------------------------------------------------------------------------------------------------------------------------------------------------------------------------------------------------------------------------------------------------------------------------------------------------------------------------------------------------------------------------------------------------------------|-----------------------------------------------------------------------------------------------------------------------------------------------------------------------------------------------------------------------------------------------------------------------------------------------------------------------------------------------------------------------------------------------------------------------------------------------------------------------------------------------------------------------------------------------------------------------------------------------------------------------------------------------------------------------------------------------------------------------------------------------------------------------------------------------------------------------------------------------------------------------------------------------------------------------------------------------------------------------------------------------------------------------------------------------------------------------------------------------------------------------------------------------|-------------------|
| 513                                                                                                                                                                                                                                                                                                                                                                                                                                                                                                                                                                                                                                                                                                                                                                                                                                                                                                                                                                                                                                                                                                                                                                                                                                                | 45    | In what month and year did they get married? Bisha iyo sanadkii guursaday?                                                                                                                                                                                                                                                                                                                                                                                                                                                                                                                                                                                                                                                           | Month (drop down) Bisha (hoois u dhig)<br>Year (2020/2021) Sanadka ( 2020 / 2021)                                                                                                                                                                                                                                                                                                                                                                                                                                                                                                                                                                                                                                                                                                                                                                                                                                                                                                                                                                                                                                                             |                   |
| WAJ 12                                                                                                                                                                                                                                                                                                                                                                                                                                                                                                                                                                                                                                                                                                                                                                                                                                                                                                                                                                                                                                                                                                                                                                                                                                             | 11 46 | I'm going to read some statements about that marriage. For each one tell me if it is true or false. Waxan ku agin doona qoraal qaar kusabsan guurkaas. Midkasta waxad ii sheegi inay run tahay mise ben.                                                                                                                                                                                                                                                                                                                                                                                                                                                                                                                             | <p>a. The marriage was planned to happen before Coronavirus Guurka waxaa la qorsheeyay intuu dhicin ka hor corona virus 0 1</p> <p>b. The marriage happened because the person was out of school before Coronavirus started Guurka wuu dhacay sababto ah qofka ku ma jirin sko skoodka ka hor intuu corona virus bilaabanin 0 1</p> <p>c. The marriage happened because schools were closed for Coronavirus Guurka wuu dhacay sababto ah Skoolada ayaa loo xiray corona virus darta 0 1</p> <p>d. The marriage happened because our family needed money Guurka wuu dhacay sababto ah qofka waxuu uu bahay lacag 0 1</p> <p>e. The marriage happened to cope with changes in that person's life, or their families' lives, that were caused by the Coronavirus pandemic: Guurku wuxuu u dhacaa sida ula qabsan laha isbedelada nololaha qofka ama nololaha qaykooda ee u sababay cudurka laha ee corona virus ka. 0 1</p> <p>f. There was another reason why the marriage happened (specify) Waxaa jiray sabab kale oo guurka uu dhacay (sheg) 0 1</p>                                                                                         |                   |
| RELATIONSHIP/PREGNANCY/FP                                                                                                                                                                                                                                                                                                                                                                                                                                                                                                                                                                                                                                                                                                                                                                                                                                                                                                                                                                                                                                                                                                                                                                                                                          |       |                                                                                                                                                                                                                                                                                                                                                                                                                                                                                                                                                                                                                                                                                                                                      |                                                                                                                                                                                                                                                                                                                                                                                                                                                                                                                                                                                                                                                                                                                                                                                                                                                                                                                                                                                                                                                                                                                                               |                   |
| 415                                                                                                                                                                                                                                                                                                                                                                                                                                                                                                                                                                                                                                                                                                                                                                                                                                                                                                                                                                                                                                                                                                                                                                                                                                                | 47    | Which statement best describes your current situation? Ooofke adiga xalada aad u tilmaama                                                                                                                                                                                                                                                                                                                                                                                                                                                                                                                                                                                                                                            | <p>a. Have a husband/partner and currently living with them Waxad ledayahay nin / lamaana oo hadana 1</p> <p>b. Have a husband/partner and NOT currently living with them Waxad ledayahay nin / lamaana oo hadana 2</p> <p>c. Do not have a husband/partner Ma lehihi nin / lamaana 0</p> <p>d. Partner deceased Wuu iga dhintirinka 0</p>                                                                                                                                                                                                                                                                                                                                                                                                                                                                                                                                                                                                                                                                                                                                                                                                    | 417<br>F1         |
| Read all answer categories aloud. Choose only one                                                                                                                                                                                                                                                                                                                                                                                                                                                                                                                                                                                                                                                                                                                                                                                                                                                                                                                                                                                                                                                                                                                                                                                                  |       |                                                                                                                                                                                                                                                                                                                                                                                                                                                                                                                                                                                                                                                                                                                                      |                                                                                                                                                                                                                                                                                                                                                                                                                                                                                                                                                                                                                                                                                                                                                                                                                                                                                                                                                                                                                                                                                                                                               |                   |
| 416                                                                                                                                                                                                                                                                                                                                                                                                                                                                                                                                                                                                                                                                                                                                                                                                                                                                                                                                                                                                                                                                                                                                                                                                                                                | 48    | When was the last time you saw this husband/partner? Goorma ahaay markii ugu dambeysa ee aad aragto ninkan / lalamaanaha                                                                                                                                                                                                                                                                                                                                                                                                                                                                                                                                                                                                             | <p>a. Within the past 2 weeks labadi isbuuc ee la soo dhafay 1</p> <p>b. Between 2-4 weeks ago Inta u dheeraysa 2-4 isbuuc 2</p> <p>c. More than 1 month ago Inta ka badan hal bil ka hor 3</p>                                                                                                                                                                                                                                                                                                                                                                                                                                                                                                                                                                                                                                                                                                                                                                                                                                                                                                                                               |                   |
| 417                                                                                                                                                                                                                                                                                                                                                                                                                                                                                                                                                                                                                                                                                                                                                                                                                                                                                                                                                                                                                                                                                                                                                                                                                                                | 49    | Are you currently satisfied in your relationship with your main partner? Would you say: Myaad ku qanacsan tahay xirirka aad la ledayahay/lamaanahaga weyn. Myaad ledayahay?                                                                                                                                                                                                                                                                                                                                                                                                                                                                                                                                                          | <p>a. Very satisfied Aad ba ugu qanacsan tahay 1</p> <p>b. Somewhat satisfied wax ayad ku qanacsan tahay 2</p> <p>c. Not satisfied or unsatisfied Kuma qanacsanid ama kuma qanacin 3</p> <p>d. Somewhat unsatisfied Wax yar kuma qanacsanid 4</p> <p>e. Very unsatisfied Aad ba ugu qanacsan 5</p>                                                                                                                                                                                                                                                                                                                                                                                                                                                                                                                                                                                                                                                                                                                                                                                                                                            |                   |
| Read answer categories aloud and select one. Soma majibu kwa sauli. Chagua jibu moja                                                                                                                                                                                                                                                                                                                                                                                                                                                                                                                                                                                                                                                                                                                                                                                                                                                                                                                                                                                                                                                                                                                                                               |       |                                                                                                                                                                                                                                                                                                                                                                                                                                                                                                                                                                                                                                                                                                                                      |                                                                                                                                                                                                                                                                                                                                                                                                                                                                                                                                                                                                                                                                                                                                                                                                                                                                                                                                                                                                                                                                                                                                               |                   |
| F1                                                                                                                                                                                                                                                                                                                                                                                                                                                                                                                                                                                                                                                                                                                                                                                                                                                                                                                                                                                                                                                                                                                                                                                                                                                 |       | IF MALE --> SKIP IF 47=C Skip 65, 69 and 71                                                                                                                                                                                                                                                                                                                                                                                                                                                                                                                                                                                                                                                                                          |                                                                                                                                                                                                                                                                                                                                                                                                                                                                                                                                                                                                                                                                                                                                                                                                                                                                                                                                                                                                                                                                                                                                               | 320               |
| Now I would like to ask a few questions about pregnancy and if and how Coronavirus may have affected you or your partner's use of family planning. I know these questions may be a bit personal, but please be as honest as you can. Hada waxaan jeclaan lahay inaan ku weydiyo su'aalo yar oo ku sabsan uurka iyo sidaa uu corona virus ka u saameeyay adiga ama lamaanahaga ee isdhanika qabka qorsheynta qoyska ee lagu kala dheeraysa carurta. Waan ogaahay su'aaloyinka wa kuwa shaqsi ah, laakiin fadlan si daacadnimado ugu jawaab.                                                                                                                                                                                                                                                                                                                                                                                                                                                                                                                                                                                                                                                                                                         |       |                                                                                                                                                                                                                                                                                                                                                                                                                                                                                                                                                                                                                                                                                                                                      |                                                                                                                                                                                                                                                                                                                                                                                                                                                                                                                                                                                                                                                                                                                                                                                                                                                                                                                                                                                                                                                                                                                                               |                   |
| 514                                                                                                                                                                                                                                                                                                                                                                                                                                                                                                                                                                                                                                                                                                                                                                                                                                                                                                                                                                                                                                                                                                                                                                                                                                                | 50    | Have you been pregnant any time since March, 2020 regardless of the state of the pregnancy or how it ended? Myaad uun lahayd waag? Kasta la bisha adeedada ee sanadka 2020, ayadoo aan loo eegin xalada uurka ama sida ay ku dhacday?                                                                                                                                                                                                                                                                                                                                                                                                                                                                                                | <p>No Maaga 1</p> <p>Yes Ha 2</p> <p>Don't know Maagi 3</p>                                                                                                                                                                                                                                                                                                                                                                                                                                                                                                                                                                                                                                                                                                                                                                                                                                                                                                                                                                                                                                                                                   |                   |
| 418                                                                                                                                                                                                                                                                                                                                                                                                                                                                                                                                                                                                                                                                                                                                                                                                                                                                                                                                                                                                                                                                                                                                                                                                                                                | 51    | Which statement best describes your current situation? Would you say: Ooofke adiga xalada aad u tilmaama                                                                                                                                                                                                                                                                                                                                                                                                                                                                                                                                                                                                                             | <p>Currently pregnant or probably pregnant Hada waxad tahay uun ama waxaan bila inaad tahay uun 1</p> <p>Currently trying to become pregnant Had waxad isku daaye inaad noqoto uun 2</p> <p>Recently had a baby Goor dhawaa aad hehlayd cunag 3</p> <p>Not currently pregnant and do not wish to become pregnant Hada mehiid uun oo ma doonayid inaad noqot 4</p> <p>Can no longer have children because you or your partner are infertile Carur ma yeelan karid maxa yeelay adiga ama lamaanahaga waas dhalmo la'aan 5</p>                                                                                                                                                                                                                                                                                                                                                                                                                                                                                                                                                                                                                   | 432<br>320<br>320 |
| Read all answer categories aloud. Select only one. Kor u akhri jawabaha oo mid kali doora                                                                                                                                                                                                                                                                                                                                                                                                                                                                                                                                                                                                                                                                                                                                                                                                                                                                                                                                                                                                                                                                                                                                                          |       |                                                                                                                                                                                                                                                                                                                                                                                                                                                                                                                                                                                                                                                                                                                                      |                                                                                                                                                                                                                                                                                                                                                                                                                                                                                                                                                                                                                                                                                                                                                                                                                                                                                                                                                                                                                                                                                                                                               |                   |
| Programming note: Add in those that said yes to Q511                                                                                                                                                                                                                                                                                                                                                                                                                                                                                                                                                                                                                                                                                                                                                                                                                                                                                                                                                                                                                                                                                                                                                                                               |       |                                                                                                                                                                                                                                                                                                                                                                                                                                                                                                                                                                                                                                                                                                                                      |                                                                                                                                                                                                                                                                                                                                                                                                                                                                                                                                                                                                                                                                                                                                                                                                                                                                                                                                                                                                                                                                                                                                               |                   |
| 432                                                                                                                                                                                                                                                                                                                                                                                                                                                                                                                                                                                                                                                                                                                                                                                                                                                                                                                                                                                                                                                                                                                                                                                                                                                | 61    | Did you get pregnant before or after the COVID-19 pandemic started? Ma waxaad noqote uun ka hor ama ka dib marku bilaawde cudurka laha ee corona virus ka                                                                                                                                                                                                                                                                                                                                                                                                                                                                                                                                                                            | <p>a. Before Ka hor 1</p> <p>b. After ka dib 0</p> <p>c. Don't know Maagi 0</p> <p>d. Refuse to answer Waan diidhe 0</p>                                                                                                                                                                                                                                                                                                                                                                                                                                                                                                                                                                                                                                                                                                                                                                                                                                                                                                                                                                                                                      |                   |
| 516                                                                                                                                                                                                                                                                                                                                                                                                                                                                                                                                                                                                                                                                                                                                                                                                                                                                                                                                                                                                                                                                                                                                                                                                                                                | 62    | When you found out about the pregnancy, did you feel: Marka aad ogaatay inaad tahay uun, ma dareente:                                                                                                                                                                                                                                                                                                                                                                                                                                                                                                                                                                                                                                | <p>a. Very unhappy Inn badan farxad la'aan 1</p> <p>b. Unhappy Farxad la'aan 2</p> <p>c. Somewhat happy qaar yar farxad ah 3</p> <p>d. Very happy inn badan oo farxad ah 4</p> <p>e. Neither Happy or unhappy 0</p> <p>f. Refuse to answer Waan diidhe inaan 0</p>                                                                                                                                                                                                                                                                                                                                                                                                                                                                                                                                                                                                                                                                                                                                                                                                                                                                            |                   |
| 517                                                                                                                                                                                                                                                                                                                                                                                                                                                                                                                                                                                                                                                                                                                                                                                                                                                                                                                                                                                                                                                                                                                                                                                                                                                | 63    | Did you intend to get pregnant at the time that you did, want to get pregnant but at a different time, or not want to get pregnant at all? Myaad doonaysay inaad uun yeelato wakhtiga aad uurka lahayd, aad rabto inaad uun yeelato iskan wakhti kala duwan ama aad rabin inaad uun yeelato gabi ahaanba                                                                                                                                                                                                                                                                                                                                                                                                                             | <p>a. Yes, at that time Haas, wakhtigaas 1</p> <p>b. Yes, but at a different time Haas, laakiin wakhti kala duwan 2</p> <p>c. No, not at all Maay, mehiid dhaman 3</p> <p>d. f. Refuse to answer Waan diidhe inaan 0</p>                                                                                                                                                                                                                                                                                                                                                                                                                                                                                                                                                                                                                                                                                                                                                                                                                                                                                                                      |                   |
| FILTER: Skip if q432=1 (pregnant before COVID-19)                                                                                                                                                                                                                                                                                                                                                                                                                                                                                                                                                                                                                                                                                                                                                                                                                                                                                                                                                                                                                                                                                                                                                                                                  |       |                                                                                                                                                                                                                                                                                                                                                                                                                                                                                                                                                                                                                                                                                                                                      |                                                                                                                                                                                                                                                                                                                                                                                                                                                                                                                                                                                                                                                                                                                                                                                                                                                                                                                                                                                                                                                                                                                                               |                   |
| 519                                                                                                                                                                                                                                                                                                                                                                                                                                                                                                                                                                                                                                                                                                                                                                                                                                                                                                                                                                                                                                                                                                                                                                                                                                                | 65    | Have you experienced any of the following challenges accessing pre-natal care during this pregnancy? Myaad la kulantay mid ka mid ah caqabadaha soo socda ee hehlaanka daryeelka dhamada ka hor inta lagu jiro uurka?                                                                                                                                                                                                                                                                                                                                                                                                                                                                                                                | <p>a. The clinics are not open to provide pre-natal care Clinic yada / nugaaha caafimaadka ama furaa inay bihiya 0 1</p> <p>b. I cannot afford the cost of pre-natal care Ma awoodi qanashka daryeelka dhamada ka hor 0 1</p> <p>c. I skip prenatal care because I am worried I will get infected with Coronavirus Waan iska dhaafay daryeel 0 1</p> <p>d. Other challenges (specify)? Caqabadoyin kale ( sheg) 0 1</p>                                                                                                                                                                                                                                                                                                                                                                                                                                                                                                                                                                                                                                                                                                                       | 519               |
| FILTER OUT THOSE WITH NO KIDS (X + X + X = 0)                                                                                                                                                                                                                                                                                                                                                                                                                                                                                                                                                                                                                                                                                                                                                                                                                                                                                                                                                                                                                                                                                                                                                                                                      |       |                                                                                                                                                                                                                                                                                                                                                                                                                                                                                                                                                                                                                                                                                                                                      |                                                                                                                                                                                                                                                                                                                                                                                                                                                                                                                                                                                                                                                                                                                                                                                                                                                                                                                                                                                                                                                                                                                                               |                   |
| 320                                                                                                                                                                                                                                                                                                                                                                                                                                                                                                                                                                                                                                                                                                                                                                                                                                                                                                                                                                                                                                                                                                                                                                                                                                                | 66    | IF GIRLS ONLY OR BOYS ONLY: I wanted to ask a few questions about the possible impacts of Coronavirus on the children in your household. I am going to read a series of statements, please tell me if each one is true or false about the kids in your household. If it is true for at least one of your children, then that would count as "true" Hadii gaboosha ama wiilal yihiin : Waxaan rabay inaan weydiyo su'aalo kusabsan saamaynta suurta galka ah ee corona virus ee carurta qoyskaaga degan labadi isbuuc la soo dhafay. Waxaan agin doona qoraal taxaan, fadlan waxaad ii sheegita mid kasta oo ku sabsan carurta qoyskiina inay run tahay ama been. Hadii tahay ruun mid ka mid carurta, marka waxaa loo xisaabi "ruun" |                                                                                                                                                                                                                                                                                                                                                                                                                                                                                                                                                                                                                                                                                                                                                                                                                                                                                                                                                                                                                                                                                                                                               |                   |
| IF BOTH BOYS AND GIRLS: I am going to ask you first about the girls in your household. I am going to read a series of statements about the possible impacts of Coronavirus on the girls in your household. For each statement, please tell me if each one is true or false about the girls in your household. If it is true for at least one girl, that would be "true". (AFTER COMPLETING, REPEAT FOR BOYS: "Now I want you to think about the boys in your household. For each statement, tell me if it is true or false" If it is true for at least one boy, then the answer is "true". Hadii labadaba wiilal ama gaboosha yihiin : Waxaan doonayaa inaan ku weydiyo marka hore gaboosha qoyskaaga. Waxaan agin doona qoraal taxaan oo kusabsan saamaynta suurta galka ah ee corona virus ee gaboosha qoyskaaga degan labadi isbuuc la soo dhafay. fadlan waxaad ii sheegita mid kasta oo ku sabsan gaboosha qoyskiina inay run tahay ama been. Hadii tahay ruun mid ka mid gaboosha, taas waxaa wayo "ruun" [ KA DIB MARKA AAD DHAMMAYSO , KU GELI WILASHA] : "Hadda waxaan rabaa inaad ka fikirtowilasha qoyskaaga jooga. Mid kasta waxaad ii sheegita inay tahay ruun ama been" Hadii tahay ruun hal wiil na haate, marka jawabta waa "ruun" |       |                                                                                                                                                                                                                                                                                                                                                                                                                                                                                                                                                                                                                                                                                                                                      |                                                                                                                                                                                                                                                                                                                                                                                                                                                                                                                                                                                                                                                                                                                                                                                                                                                                                                                                                                                                                                                                                                                                               |                   |
|                                                                                                                                                                                                                                                                                                                                                                                                                                                                                                                                                                                                                                                                                                                                                                                                                                                                                                                                                                                                                                                                                                                                                                                                                                                    |       |                                                                                                                                                                                                                                                                                                                                                                                                                                                                                                                                                                                                                                                                                                                                      | <p>f. My children are spending more time indoors Caruraydu waqti badan aye ku qaataan guriga 0 1</p> <p>g. My children are spending more time idling about in the community Caruraydu waqti badan aye ku qaataan dhex wareega bulshada 0 1</p> <p>h. My children have spent more time doing farming/tending livestock Caruraydu waxay in badan waqti ku qaataan durka / xooloobada aye laahadaan 0 1</p> <p>i. My children have done things to help earn money for the family Caruraydu waxay saameeyeen waxyabada say ku caawinayaan qoyska inay lacag ku helaan 0 1</p> <p>j. My children have skipped immunizations or other health care visits they were supposed to get Caruraydu ma helin talaalka ama boogashooyin kale oo daryeelka caafimaad oo ay ahaayd inay helaan 0 1</p> <p>k. My children's mental health has suffered Caafimaadka maskaada ee carurteyda ayaa dhib gaarte 0 1</p> <p>m. I worry that my children's education will be permanently harmed Waxan ka walwalsan yahay waabarashada carurteyda inaad dhib ugu li maane 0 1</p> <p>n. My children are now back in school Carurteyda waxay ku labten iskoolka 0 1</p> |                   |
| ECONOMIC STATUS PRIOR TO COVID-19                                                                                                                                                                                                                                                                                                                                                                                                                                                                                                                                                                                                                                                                                                                                                                                                                                                                                                                                                                                                                                                                                                                                                                                                                  |       |                                                                                                                                                                                                                                                                                                                                                                                                                                                                                                                                                                                                                                                                                                                                      |                                                                                                                                                                                                                                                                                                                                                                                                                                                                                                                                                                                                                                                                                                                                                                                                                                                                                                                                                                                                                                                                                                                                               |                   |
| Now I would like to ask you a few questions about the money that you were earning before Coronavirus and how that may compare to what you are able to earn now. Hada waxaan jeclaan laha inaan ku weydiyo dhawr su'aalood oo ku sabsan lacagta aad heli ka hor corona virus iyo                                                                                                                                                                                                                                                                                                                                                                                                                                                                                                                                                                                                                                                                                                                                                                                                                                                                                                                                                                    |       |                                                                                                                                                                                                                                                                                                                                                                                                                                                                                                                                                                                                                                                                                                                                      |                                                                                                                                                                                                                                                                                                                                                                                                                                                                                                                                                                                                                                                                                                                                                                                                                                                                                                                                                                                                                                                                                                                                               |                   |

| sida taasi uu barbardhigi karto lacagta aad hada heli karto                                                                                                                                                                                                                                                                                                                                                                                                                                                                                                                                                                                                                                                       |    |                                                                                                                                                                                                                                                                                                                                                                                          |                                                                                                                                                        |                            |                                                           |
|-------------------------------------------------------------------------------------------------------------------------------------------------------------------------------------------------------------------------------------------------------------------------------------------------------------------------------------------------------------------------------------------------------------------------------------------------------------------------------------------------------------------------------------------------------------------------------------------------------------------------------------------------------------------------------------------------------------------|----|------------------------------------------------------------------------------------------------------------------------------------------------------------------------------------------------------------------------------------------------------------------------------------------------------------------------------------------------------------------------------------------|--------------------------------------------------------------------------------------------------------------------------------------------------------|----------------------------|-----------------------------------------------------------|
| 435                                                                                                                                                                                                                                                                                                                                                                                                                                                                                                                                                                                                                                                                                                               | 67 | In the past month, would you say that you've been making the same, more or less than what you were earning before Coronavirus. <b>Bilshi la soo dhafay, ma dhishi leheda lamaahagu wuuu helay mid la mid ah, in badan ama in yar intaa corona virus ka hor</b>                                                                                                                           | a. Same Mid la mid ah<br>b. More In badan<br>c. Less In yar                                                                                            | 1<br>2<br>3                |                                                           |
| 439                                                                                                                                                                                                                                                                                                                                                                                                                                                                                                                                                                                                                                                                                                               | 68 | In the past month, would you say that your partner has been making the same, more or less than before the Coronavirus. <b>Bilshi la soo dhafay, ma dhishi leheda lamaahagu wuuu helay mid la mid ah, in badan ama in yar intaa corona virus ka hor</b>                                                                                                                                   | a. Same Mid la mid ah<br>b. More In badan<br>c. Less In yar<br>d. Don't Know Maagi<br>e. No partner Ma lahi lamaana                                    | 1<br>2<br>3<br>4<br>5      |                                                           |
| 441                                                                                                                                                                                                                                                                                                                                                                                                                                                                                                                                                                                                                                                                                                               | 69 | Would you say that your reliance on your partner/husband/wife for basic needs has changed since the beginning of COVID-19? <b>Miyad dhishi leheda kalsoori ee lamaahaga / qaybaha / naagada ee baahida aasasiga ah ayey wax istaagteen siduu COVID-19 uu bilowde</b>                                                                                                                     | Yes, more reliant Haa, iku kalsoori badan<br>Yes, less reliant Haa, iku kalsoori yar<br>No, stayed the same Maya, lama badehin                         | 2<br>1<br>0                |                                                           |
| 520                                                                                                                                                                                                                                                                                                                                                                                                                                                                                                                                                                                                                                                                                                               | 70 | In the past month, would you say that you've been making the same, more or less than what you were earning as compared to the first six months of Coronavirus (March - September 2020). <b>Bilshi la soo dhafay, ma dhishi leheda lamaahagu wuuu helay mid la mid ah, in badan ama in yar intaa corona virus ka hor</b>                                                                  | a. Same Mid la mid ah<br>b. More In badan<br>c. Less In yar                                                                                            | 1<br>2<br>3                |                                                           |
| If Q439-5 (no partner) → SKIP                                                                                                                                                                                                                                                                                                                                                                                                                                                                                                                                                                                                                                                                                     |    |                                                                                                                                                                                                                                                                                                                                                                                          |                                                                                                                                                        |                            |                                                           |
| 521                                                                                                                                                                                                                                                                                                                                                                                                                                                                                                                                                                                                                                                                                                               | 71 | In the past month, would you say that your partner has been making the same, more or less as compared to the first six months of Coronavirus (March - September 2020). <b>Bilshi la soo dhafay, ma dhishi leheda lamaahagu wuuu helay mid la mid ah, in badan ama in yar marka la barbar dhigo lixda bilow oo ugu horeysay intaa corona virus ka ( Bilsha march - september ka 2020)</b> | a. Same Mid la mid ah<br>b. More In badan<br>c. Less In yar<br>d. Don't Know Maagi<br>e. No partner Ma lahi lamaana                                    | 1<br>2<br>3<br>4<br>5      |                                                           |
| DECISION MAKING (EMERGE)                                                                                                                                                                                                                                                                                                                                                                                                                                                                                                                                                                                                                                                                                          |    |                                                                                                                                                                                                                                                                                                                                                                                          |                                                                                                                                                        |                            |                                                           |
| I'm going to ask you a few questions now about how you make decisions and in general how much control do you have over personal decisions that have a major impact on your life, such as whether you will go out of the house into the community, with whom you will associate with outside of your household, or when and from whom to seek health care for yourself? <b>waxan ku weydina a/salo yar oo ku saban sidaad u qaadata go'aanka iyo intaad hakameyn karta go'aanka shaqiyed ee ku yeesha saameyn weyn noolashada sida oo kale intaad ka bixi karto guriga sidaad u dhex qaado bulshada, sida ula dhagmi dadka ka baxsan qoyskaaga ama marka iyo xage aad ka heli daryelka caafimadka ee raftaada.</b> |    |                                                                                                                                                                                                                                                                                                                                                                                          |                                                                                                                                                        |                            |                                                           |
| 442                                                                                                                                                                                                                                                                                                                                                                                                                                                                                                                                                                                                                                                                                                               | 72 | A. For each of the following decisions, please tell me how much control you currently have over your decision: None, very little, some, a fair amount or full control: <b>Go'aan kasta oo soo socda, dadan ii sheeg xakameyn inta lareg ayasad hada ledahay ee go'aankaga. Midna, aad ba u yartahay, qaar, dhex-dhexaad ama xakameyn taam ah.</b>                                        | NONE Midna<br>VERY LITTLE Aad ba u yartahay<br>A FAIR AMOUNT In yar<br>FULL CONTROL xakameyn taam ah                                                   | LE RI SH DE NO MC<br>1 2 3 |                                                           |
| 444                                                                                                                                                                                                                                                                                                                                                                                                                                                                                                                                                                                                                                                                                                               | 73 | How much control do you have to decide when you want to leave the house to go into the community your own? <b>Would you say, none, very little, some, a fair amount or full control? Xakameyn intaad lareg ayasad ledahay marka aad rabto intaad ka baxdo guriga ee aad dhex qaado bulshada? Miyad dhishi lahayd, midna, aad ba u yartahay, qaar, dhex-dhexaad ama xakameyn taam ah.</b> | 1 2 3 4 5                                                                                                                                              | 1 2 3                      |                                                           |
| 445                                                                                                                                                                                                                                                                                                                                                                                                                                                                                                                                                                                                                                                                                                               | 74 | How much control do you have to decide when and where to seeking health care? <b>Would you say none, very little, some, a fair amount or full control? Xakameyn intaad lareg ayasad ledahay marka iyo xage aad ka heli daryelka caafimadka ee raftaada? Miyad dhishi lahayd, midna, aad ba u yartahay, qaar, dhex-dhexaad ama xakameyn taam ah.</b>                                      | 1 2 3 4 5                                                                                                                                              | 1 2 3                      |                                                           |
| 446                                                                                                                                                                                                                                                                                                                                                                                                                                                                                                                                                                                                                                                                                                               | 75 | How much control do you have to decide to working outside of the house. <b>Would you say none, very little, some, a fair amount or full control? Xakameyn intaad lareg ayasad ledahay in badan u soo adhegidi qoyskiina? Miyad dhishi lahayd, midna, aad ba u yartahay, qaar, dhex-dhexaad ama xakameyn taam ah.</b>                                                                     | 1 2 3 4 5                                                                                                                                              | 1 2 3                      |                                                           |
| 447                                                                                                                                                                                                                                                                                                                                                                                                                                                                                                                                                                                                                                                                                                               | 76 | How much control do you have to make large household purchases? <b>Would you say none, very little, some, a fair amount or full control? Xakameyn intaad lareg ayasad ledahay in badan u soo adhegidi qoyskiina? Miyad dhishi lahayd, midna, aad ba u yartahay, qaar, dhex-dhexaad ama xakameyn taam ah.</b>                                                                             | 1 2 3 4 5                                                                                                                                              | 1 2 3                      |                                                           |
| 448                                                                                                                                                                                                                                                                                                                                                                                                                                                                                                                                                                                                                                                                                                               | 77 | How much control do you have to decide to buy food, water and soap for the household. <b>Would you say none, very little, some, a fair amount or full control? Xakameyn intaad lareg ayasad ledahay in badan u soo adhegidi qoyskiina? Miyad dhishi lahayd, midna, aad ba u yartahay, qaar, dhex-dhexaad ama xakameyn taam ah.</b>                                                       | 1 2 3 4 5                                                                                                                                              | 1 2 3                      |                                                           |
| MENTAL HEALTH (PHO-9)                                                                                                                                                                                                                                                                                                                                                                                                                                                                                                                                                                                                                                                                                             |    |                                                                                                                                                                                                                                                                                                                                                                                          |                                                                                                                                                        |                            |                                                           |
| 450                                                                                                                                                                                                                                                                                                                                                                                                                                                                                                                                                                                                                                                                                                               | 78 | Over the last 2 weeks, how often have you been bothered by any of the following problems. For each one, tell me about how many days. <b>labadi isbuuc ee la soo dhafay, iminka jee ayee ku fidsanyi dhibaatooyinka soo socda.Midekasta, engeg iminka maalin.</b>                                                                                                                         | a. 0 days 0 maalin<br>b. 1-7 days 1-7 maalin<br>c. 8-12 days 8-12 maalin<br>d. 13 or 14 days 13 ama 14 maalin<br>e. REFUSE TO ANSWER Waan diidhe inaan | 1<br>2<br>3<br>4<br>5      | If a=0 or Refused, don't ask b<br>Mor 1<br>Les 2<br>San 3 |
| 451                                                                                                                                                                                                                                                                                                                                                                                                                                                                                                                                                                                                                                                                                                               | 79 | Feeling down, depressed, or hopeless <b>Waxaad dareemi hoos u dhac, wabaha ama niya jab</b>                                                                                                                                                                                                                                                                                              | a. 0 days 0 maalin<br>b. 1-7 days 1-7 maalin<br>c. 8-12 days 8-12 maalin<br>d. 13 or 14 days 13 ama 14 maalin<br>e. REFUSE TO ANSWER waan diidhe inaan | 1<br>2<br>3<br>4<br>5      | Mor 1<br>Les 2<br>San 3                                   |
| 522                                                                                                                                                                                                                                                                                                                                                                                                                                                                                                                                                                                                                                                                                                               | 80 | Feeling nervous, anxious or on edge <b>Waxaad dareemi cabsi, walwal ama gees ahan</b>                                                                                                                                                                                                                                                                                                    | 0 days 0 maalin<br>1-7 days 1-7 maalin<br>8-12 days 8-12 maalin<br>13 or 14 days 13 ama 14 maalin<br>REFUSE TO ANSWER waan diidhe inaan ka jir         | 1<br>2<br>3<br>4<br>5      | If a=0 or Refused, don't ask b<br>Mor 1<br>Les 2<br>San 3 |
| 523                                                                                                                                                                                                                                                                                                                                                                                                                                                                                                                                                                                                                                                                                                               | 81 | Not being able to stop or control worrying <b>Awood u ma lahi inaan joojyo ama xakameeyo walwala</b>                                                                                                                                                                                                                                                                                     | 0 days 0 maalin<br>1-7 days 1-7 maalin<br>8-12 days 8-12 maalin<br>13 or 14 days 13 ama 14 maalin<br>REFUSE TO ANSWER waan diidhe inaan ka jir         | 1<br>2<br>3<br>4<br>5      | If a=0 or Refused, don't ask b<br>Mor 1<br>Les 2<br>San 3 |
| 524                                                                                                                                                                                                                                                                                                                                                                                                                                                                                                                                                                                                                                                                                                               | 82 | Since the start of the Coronavirus (COVID-19) pandemic, have you sought help from family or friends because you felt low, anxious or stressed? <b>Sida uu bilaawde cudurka faaf ee corona virus ka (COVID-19), Ma ka raadistay caawimaad qoyska ama saaxiibadamaa yeelay waxaad darentay hoos u dhac, walwal ama walac?</b>                                                              | No Maya<br>Yes Haa<br>Don't know Maagi<br>Refuse to answer waan diidhe inaan ka jir                                                                    | 1<br>2<br>3<br>4           |                                                           |
| 229                                                                                                                                                                                                                                                                                                                                                                                                                                                                                                                                                                                                                                                                                                               | 86 | Do we have your permission to recontact you in the future? <b>Ma hayaana ogdashaaga si aan mustaqbalka dambe kuula soo xiriima</b>                                                                                                                                                                                                                                                       | Yes Haa<br>No Maya                                                                                                                                     | 1<br>2                     | 89                                                        |
| 134                                                                                                                                                                                                                                                                                                                                                                                                                                                                                                                                                                                                                                                                                                               | 87 | Could you give me a contact we can use to contact you in the future? <b>Ma ii siin kartaa nambaar aan isiomaaali karno si aan ku guula soo xiriimo mustaqbalka dambe</b>                                                                                                                                                                                                                 | Phone Number _____ Nambaarka telefonka _____                                                                                                           |                            |                                                           |

|     |    |                                                                                                                                                                                                                                                                                                                                                                                                 |                                                                                                                            |              |
|-----|----|-------------------------------------------------------------------------------------------------------------------------------------------------------------------------------------------------------------------------------------------------------------------------------------------------------------------------------------------------------------------------------------------------|----------------------------------------------------------------------------------------------------------------------------|--------------|
|     |    |                                                                                                                                                                                                                                                                                                                                                                                                 | (confirm)    Xaqiji                                                                                                        |              |
| 229 | 88 | Could you tell me your name or nickname? <i>Ma ii sheegi karta magacaaga ama magacaaga naanjada ah / magacaa lagu yqaano</i>                                                                                                                                                                                                                                                                    |                                                                                                                            |              |
|     | 89 | As you may recall, [name of adolescent] is also participating in our COVID-19 research and we interviewed them last time as well. May we have your permission to interview them again? <i>Sidaad xaqiiso (i magaca qaan gaarka ah) ayaa sidoo kale ku qeyb qaatay cilmii baaristayna ee COVID-19 oo waxaan la yeelanay wareysi waqtigi u dambe. Maqashaday inay wareysi markale la yeelano?</i> | No <i>Maya</i><br>Yes <i>Haa</i>                                                                                           | 1<br>2       |
|     |    | Is [ADOLESCENT GIRL] [THAT BOY] at home? <i>[GABADHA QAANGAARKA AH [WIIL KAASI ] ma joogan guriga?</i>                                                                                                                                                                                                                                                                                          |                                                                                                                            |              |
|     |    | Can you give me the phone number I can use to talk to [ADOLESCENT GIRL] [THAT BOY]? <i>Ma i sin karta telefon nambarka ee isticmaali karo si aan ula hadlo [ GABADHA QAANGAARKA AH] [WIIL KAASI]?</i>                                                                                                                                                                                           |                                                                                                                            |              |
|     |    | <i>If adolescent not available for interview ask: Why is [adlescent_participant_name] not available for interview? Hadii uu qaan gaarka la wareysan tahay uu aan joogin weydii sababta oo i magaca ka qeyb aafka aad u joogin si loo la yeelna wareysi</i>                                                                                                                                      | <i>Gone back to school - waxaa ku tabto ak</i><br><i>Hashe travelled and cant be reached on phone</i><br><i>Other</i>      | 1<br>2<br>77 |
|     |    | <i>BOY] school located? Xaige aad ku yeela shuulka ( qaan-garka gabadha) ( wiilka)</i>                                                                                                                                                                                                                                                                                                          | County (Add drop down list of 47 counties)<br>Dowlad gobaleedka ( ku dsarListiga 47 )<br>Outside Kenya Mel ka baxsan kenya | 1<br>2       |
|     |    |                                                                                                                                                                                                                                                                                                                                                                                                 | Enter contact name <i>Qoor magaca la la xariirayo</i>                                                                      | 1            |
|     |    | What is the name of the school where [ADOLESCENT GIRL] [THAT BOY] attends? <i>Masay tahay magaca shuulka ee [qaan-garka gabadha]</i>                                                                                                                                                                                                                                                            | Enter phone number<br><i>numbarka telefonka</i>                                                                            | 2            |
|     |    | Please share with me contacts that I could use to reach [ADOLESCENT GIRL] [THAT BOY] from school. <i>Fadlan waxaad iis wadhagla xambarka aan isticmaali karo si aan ula xiro i qaan-garka gabadha i wiilka ee shuulka</i>                                                                                                                                                                       | No <i>Maya</i>                                                                                                             | 1            |
|     |    | May we have your permission to interview [ADOLESCENT GIRL] [THAT BOY] if the school allows? <i>Ma naalinee ogotasho si aan wareysi ula yeelano i qaan-garka gabadha i wiilka haddi shuulka roo aqbato?</i>                                                                                                                                                                                      | Yes <i>Haa</i>                                                                                                             | 2            |
|     |    | We have reached the end of the interview. Thank you so much for your time and for answering our questions. Do you have any question or comment for me? <i>Waxaan gaarnay dhamadka wareysiga .Aad baad ugu mahadsantahay waqtigaaga iyo ka jawaabista su'aalahaayna. Ma qabta wax su'al ama taalo oo aniga ii gaar ah</i>                                                                        | Yes <i>Haa</i><br>No <i>Maya</i>                                                                                           | 1<br>2       |
|     |    | 226i - if yes, program a prompt offer a referral for SGBV counseling- 226i - Hadii haa tahay isku diyaari inaad uu gudbisno la taaliyada SGBV.                                                                                                                                                                                                                                                  |                                                                                                                            |              |
|     |    | If yes to four or more 450 and 451, referral for mental health services Hadii haa tahay afaar ama in ka badan 450 iyo 451, uu gudbi adeegyada caafimaadka dhimirka                                                                                                                                                                                                                              |                                                                                                                            |              |
